# Supplementary material for: Particulate emissions from cooking activities: emission factors, emission dynamics, and mass spectrometric analysis for different preparation methods
Source: Copernicus journal article supplement (doi:10.5194/egusphere-2023-2172), 2023-10-04
Supplement: Supplementary file 1 [file egusphere-2023-2172-supplement.pdf]

# Supplement for “Particulate emissions from cooking activities: emission factors, emission dynamics, and mass spectrometric analysis for different preparation methods”

Julia Pikmann<sup>1</sup>, Frank Drewnick<sup>1</sup>, Friederike Fachinger<sup>1</sup>, Stephan Borrmann<sup>1,2</sup>

5 <sup>1</sup>Particle Chemistry Department, Max Planck Institute for Chemistry, Mainz, 55128, Germany

<sup>2</sup>Institute for Atmospheric Physics, Johannes Gutenberg University Mainz, Mainz, 55128, Germany

*Correspondence to:* Frank Drewnick (frank.drewnick@mpic.de)

## S1 Calculation of mass concentrations

For calculation of the mass concentrations of PM<sub>1</sub>, PM<sub>2.5</sub>, and PM<sub>10</sub> in a first step the particle number size distributions measured with the FMPS ( $d_p = 5.6 - 560$  nm) and OPC ( $d_p = 0.25 - 32$  μm) were combined. To this end, the OPC data were re-binned from optical to geometric particle diameters before merging them with the FMPS data. For the Christmas market data, we assumed for the optical particle properties values for a semi-urban aerosol, based on literature values: For fine particles ( $d_p < 700$  nm), we assumed a mixture of organics, ammonium chloride, ammonium sulfate, and ammonium nitrate with refractive indices of or close to 1.55 (Levin et al., 2010; Tang, 1996), and for coarse particles ( $d_p > 3000$  nm), we assumed a mixture of mineral dust and sea salt with refractive indices of 1.56-i.006 (Seinfeld and Pandis, 2006) and 1.544 (Hinds, 1999), respectively. For particles in the intermediate size range, a mixture of both particle types was assumed, with log-linearly interpolated particle numbers of the fine and coarse particles. For the laboratory cooking experiments, we supposed that the fine particles consisted mostly of rapeseed oil, the used oil for cooking, with a refractive index of 1.47 (Rumble, 2022) and within the coarse particles, 5% by particle number were assumed to be of salt and the remainder oil. For the Christmas market data, we assumed for the coarse particles a particle number fraction of 0.9 for mineral dust and 0.1 for sea salt. The necessary Mie scattering curves for the different particle types, which were used for the conversion of optical into geometric particle diameters, were calculated using an in-house tool (Vetter, 2004) applying the measurement geometry in the OPC, i.e. a refractive index of 1.588 of the calibration particles (PSL), a scattering angle of 60° to 120°, a laser wavelength of 655 nm, and a distance of the detector to the scattering volume of 1.5 cm (Vetter, 2004).

Since we found that the FMPS under-measures the concentrations in the uppermost size channels, these were corrected using the lower OPC size channels.

To calculate the mass concentrations from the resulting merged size distributions, different densities were used for different particle types assuming spherical particles. The densities for salt and mineral dust were assumed to be 2.17 g cm<sup>-3</sup> (Baron et al., 2011) and 2.7 g cm<sup>-3</sup> (Hinds, 1999; Reitz, 2011), respectively. The density for fine particles was calculated using the AMS and black carbon data based on the equation of Salcedo et al. (2006) for the overall density and Kuwata et al. (2012) for the

density of organics. In this process, only data points were considered with AMS-measured organic mass concentrations above  $1 \mu\text{g m}^{-3}$ .

The uncertainty for the mass concentrations was estimated to be 34%, based on error propagation from the uncertainty from the merging of the FMPS and OPC data (30%) and the uncertainty of the density (15%).

## 35 S2 PMF data analysis

As described in Pikmann et al., SI (2022), “for PMF analysis of the organic aerosol, the high-resolution data with error matrix were prepared with PIKA 1.23I. Ions with signal-to-noise ratio (SNR)  $< 2$  were down weighted through increase of the corresponding error by a factor of 2, while ions with SNR  $< 0.2$  were discarded from the data. The  $\text{CO}_2^+$  ion and related ions ( $m/z$  16, 17, 18 and 28) were down weighted by a factor of  $\text{SQRT}(5)$  as they all contain the same information. Additionally, “noisy” ions without contribution to the total measured signal were discarded. To find a robust solution the analysis was run for 1 to 7 factor solutions, with fpeak -1 to 1 (steps of 0.1) and seed 0 to 50 (steps of 1).” The chosen three-factor solutions were for fpeak = 0 and seed = 2 for Ingelheim and seed = 8 for Bingen. Solutions with more factors resulted in splitting of factors, generating factors which were physically meaningless. The PMF solutions were assigned to aerosol types through comparison of the factor mass spectra with literature references and of the factor time series with the data from other instruments. The uncertainty of the time series ( $\Delta_{TS}$ ) and mass spectra ( $\Delta_{MS}$ ) for the chosen solution was estimated using two methods: 1. the bootstrap method (Ulbrich et al., 2009); 2. by calculating the standard deviation for each time step resp.  $m/z$  from the set of all physically meaningful solutions obtained by variation of the fpeak and seed value as shown in Eq. (S1) and (S2) (Freutel et al., 2013).

$$\Delta_{TS} = \frac{\sum_{i=1}^n \frac{\sigma_{p,i}}{\bar{x}_{p,i}}}{n} \quad (\text{S1})$$

$$\Delta_{MS} = \frac{\sum_{i=1}^n \sigma_{p,i}}{\sum_{i=1}^n \bar{x}_{p,i}} \quad (\text{S2})$$

50  $n$  is the number of  $m/z$  or time intervals,  $\bar{x}_{p,i}$  and  $\sigma_{p,i}$  are the average and standard deviation for one  $m/z$  or time interval, respectively. The uncertainty was in the order of 20 – 30%.

## S3 Uncertainty calculation of $\text{RIE}_{\text{COA}}$ values

The uncertainty of the  $\text{RIE}_{\text{COA}}$  value was calculated using multiplicative uncertainty propagation from the uncertainty of the  $\text{PM}_{10}$  mass concentration based on the FMPS and OPC data ( $\text{PM}_{10}$ ) and the  $\text{PM}_{10}$  mass concentration from the AMS and BC measurements ( $\text{PM}_{10,\text{AMS+BC}}$ ). This calculation is based on the method of Katz et al. (2021).

The uncertainty of  $PM_1$  is dependent on the uncertainties of the calculated density and of the  $PM_1$  volume and amounts to 34% (see Sect. S1). For the uncertainty of  $PM_{1,AMS+BC}$  only the measured organics fraction ( $M_{Org}$ ) is considered, as the inorganics and BC concentrations were negligible. The uncertainty of the organics mass fraction is dependent on the uncertainty of the measured instrument flow rate  $Q_{AMS}$  ( $\Delta Q_{AMS} = 10\%$ ) and the uncertainty of the calibrated ionization efficiency  $IE_{NO_3}$  ( $\Delta IE_{NO_3} = 15\%$ ) resulting in 18% total uncertainty (Eq. (S3) and (S4)) assuming  $CE = 1$  without any uncertainty.

$$M_{Org} \sim \frac{1}{Q_{AMS}} * \frac{1}{IE_{NO_3}} \quad (S3)$$

$$\Delta M_{Org} = \sqrt{0.1^2 + 0.15^2} = 0.18 = 18\% \quad (S4)$$

The total uncertainty for  $RIE_{COA}$  amounts to 38% (Eq. (S5)).

$$\Delta RIE_{COA} = \sqrt{0.18^2 + 0.34^2} = 0.38 = 38\% \quad (S5)$$

#### S4 Additional figures and tables

65 Table S1: List of prepared dishes and the amounts of individual ingredients.

| Dish                  | Preparation method | Ingredients                                                                                                                                                                                                                                  |
|-----------------------|--------------------|----------------------------------------------------------------------------------------------------------------------------------------------------------------------------------------------------------------------------------------------|
| Fried potatoes        | Stir-frying        | 1 kg potatoes (unpeeled, sliced)<br>~6 tbsp rapeseed oil (for frying)                                                                                                                                                                        |
| Bratwurst             | Stir-frying        | 4 bratwurst (total 600 – 640 g)<br>~2 tbsp rapeseed oil (for frying)                                                                                                                                                                         |
| Schnitzel             | Stir-frying        | 4 schnitzel (total 680 – 760 g)<br>~8 tbsp rapeseed oil (for frying)                                                                                                                                                                         |
| Fish                  | Stir-frying        | 2.5 whole trouts (total 800 – 1200 g)<br>Flour for breading<br>~6 tbsp rapeseed oil (for frying)                                                                                                                                             |
| Spaghetti Bolognese   | Stir-frying        | 400 g ground beef<br>250 g spaghetti<br>1 carrot<br>175 g celery<br>1 onion<br>2 garlic cloves<br>800 g tomatoes (canned)<br>20 g fresh basil<br>~4 tbsp rapeseed oil (for frying)<br>Condiments: dried oregano, dried thyme, dried bay leaf |
| Stir-fried vegetables | Stir-frying        | 2 onions<br>2 bell peppers<br>6 tomatoes<br>1 zucchini<br>250 g champignons<br>2 garlic cloves<br>20 g fresh basil<br>200 g cream<br>~4 tbsp rapeseed oil (for frying)<br>Condiments: paprika                                                |

(continued on next page)

**Table S1: List of prepared dishes and the amounts of individual ingredients. (continued)**

| <b>Dish</b>                   | <b>Preparation method</b> | <b>Ingredients</b>                                                                                                                                                          |
|-------------------------------|---------------------------|-----------------------------------------------------------------------------------------------------------------------------------------------------------------------------|
| Indian curry                  | Stir-frying               | 420 g chicken breast<br>240 g chickpeas (canned)<br>2 carrots<br>2 red onions<br>30 g ginger<br>2 garlic cloves<br>400 mL coconut milk<br>~4 tbsp rapeseed oil (for frying) |
| Boiled potatoes               | Boiling                   | 1 kg potatoes in salted water (unpeeled, whole)                                                                                                                             |
| Rice                          | Boiling                   | 250 g rice in salted water                                                                                                                                                  |
| Noodles                       | Boiling                   | 250 g spaghetti in salted water                                                                                                                                             |
| Bavarian doughnut<br>(in pot) | Deep-frying               | Dough prepared from:<br>125 mL milk<br>100 g butter<br>500 g wheat flour<br>7 g dried yeast<br>30 g sugar<br>8 g vanilla sugar<br>2 eggs<br>1.5 L rapeseed oil for frying   |
| French fries (pot)            | Deep-frying               | 1 kg French fries (frozen)<br>2.5 L rapeseed oil for frying                                                                                                                 |
| French fries<br>(deep fryer)  | Deep-frying               | 1 kg French fries (frozen)<br>2.5 L rapeseed oil for frying                                                                                                                 |
| Pizza                         | Baking                    | 3 salami pizza (frozen, total 960 g)                                                                                                                                        |
| Baked potatoes                | Baking                    | 1 kg potatoes (as wedges, unpeeled)<br>3 – 4 tbsp. rapeseed oil                                                                                                             |

(continued on next page)

**Table S1: List of prepared dishes and the amounts of individual ingredients. (continued)**

| <b>Dish</b>       | <b>Preparation method</b>  | <b>Ingredients</b>                                                                                                                                                  |
|-------------------|----------------------------|---------------------------------------------------------------------------------------------------------------------------------------------------------------------|
| Brownies          | Baking                     | Dough prepared from:<br>375 g butter<br>600 g dark chocolate<br>9 eggs<br>500 g sugar<br>16 g vanilla sugar<br>375 g flour<br>50 g cocoa<br>275 g walnuts (chopped) |
| Steaks            | Grilling on gas grill      | 4 pork steaks, marinated (total 1100 – 1200 g)<br>Marinade: rapeseed oil, onions, paprika                                                                           |
| Vegetable skewers | Grilling on gas grill      | 10 vegetable skewers (total 1600 – 1800 g) made of zucchini, eggplant, bell pepper, mushroom, onion, garlic                                                         |
| Steaks            | Grilling on charcoal grill | 4 pork steaks, marinated (total 1050 – 1300 g)<br>Marinade: rapeseed oil, onions, paprika                                                                           |

**Table S2: MoLa instruments used for the measurements. For further information see Drewnick et al. (2012).**

| Instrument                                               | Measured variable                                                                    | Particle diameter range | Time resolution | Lower detection limit                                                                                                                                                               |
|----------------------------------------------------------|--------------------------------------------------------------------------------------|-------------------------|-----------------|-------------------------------------------------------------------------------------------------------------------------------------------------------------------------------------|
| CPC <sup>a</sup>                                         | Particle number concentration                                                        | 5 nm – 3 µm             | 1 s             | N/A                                                                                                                                                                                 |
| FMPS <sup>b</sup>                                        | Particle size distribution based on mobility diameter                                | 5.6 – 560 nm            | 1 s             | N/A                                                                                                                                                                                 |
| OPC <sup>c</sup>                                         | Particle size distribution based on optical diameter                                 | 0.25 – 32 µm            | 6 s             | N/A                                                                                                                                                                                 |
| Aethalometer <sup>d</sup>                                | Black and brown carbon mass concentrations                                           | < 1.0 µm                | 1 s             | < 5 ng m <sup>-3</sup><br>(1-hour average)                                                                                                                                          |
| MAAP <sup>e</sup>                                        | Black carbon mass concentration                                                      | < 1.0 µm                | 60 s            | 0.01 µg m <sup>-3</sup>                                                                                                                                                             |
| PAS <sup>f</sup>                                         | Polyaromatic hydrocarbon mass concentration on particle surface                      | 10 nm – 1 µm            | 12 s            | 1 ng m <sup>-3</sup>                                                                                                                                                                |
| HR-ToF-AMS <sup>g</sup>                                  | Size-dependent non-refractory chemical composition                                   | 40 nm – 1 µm            | 15 – 30 s       | Sulfate: 0.04 µg m <sup>-3</sup><br>Nitrate: 0.02 µg m <sup>-3</sup><br>Ammonium: 0.05 µg m <sup>-3</sup><br>Organics: 0.09 µg m <sup>-3</sup><br>Chloride: 0.02 µg m <sup>-3</sup> |
| AirPointer <sup>h</sup>                                  | Mixing ratio of CO, SO <sub>2</sub> , O <sub>3</sub>                                 | N/A                     | 4 s             | O <sub>3</sub> : < 1.0 ppbv<br>SO <sub>2</sub> : < 1.0 ppbv<br>CO: < 0.2 ppmv                                                                                                       |
| NO <sub>2</sub> /NO/NO <sub>x</sub> Monitor <sup>i</sup> | Mixing ratio of NO <sub>2</sub> , NO, NO <sub>x</sub>                                | N/A                     | 5 s             | < 1 ppbv                                                                                                                                                                            |
| LICOR <sup>j</sup>                                       | Mixing ratio of CO <sub>2</sub>                                                      | N/A                     | 1 s             | < 1 ppmv                                                                                                                                                                            |
| Meteorological Station <sup>k</sup>                      | Wind speed, wind direction, relative humidity, temperature, rain intensity, pressure | N/A                     | 1 s             | N/A                                                                                                                                                                                 |

<sup>a</sup>Condensation Particle Counter, model 3786, TSI, Inc., USA. <sup>b</sup>Fast Mobility Particle Sizer, model 3091, TSI, Inc., USA. <sup>c</sup>Optical Particle Counter, model 1.109, Grimm Aerosoltechnik, Germany. <sup>d</sup>Magee Scientific Aethalometer®, model AE33, Magee Scientific, USA; used for qualitative time series analysis only. <sup>e</sup>Multi-Angle Absorption Photometer, Carusso model 2012, Thermo Electron Corporation, USA. <sup>f</sup>Photoelectric Aerosol Sensor PAS2000, EcoChem Analytics, USA. <sup>g</sup>High-Resolution Time-of-Flight Aerosol Mass Spectrometer, Aerodyne Research, Inc., USA. <sup>h</sup>AirPointer, Recordum Messtechnik GmbH, Austria. <sup>i</sup>NO<sub>2</sub>/NO/NO<sub>x</sub> Monitor, model 405 nm, 2B Technologies, Inc., USA. <sup>j</sup>LI840, LI-COR, Inc., USA. <sup>k</sup>WXT520, Vaisala, Finland.

**Table S3: List of mass spectra used as reference to calculate average mass spectra for the respective aerosol types (Ulbrich et al., 2022).**

| <b>Spectrum ID</b> | <b>Aerosol type</b> | <b>Reference</b>         |
|--------------------|---------------------|--------------------------|
| A_HR_001           | HOA                 | Docherty et al. (2011)   |
| A_HR_003           | LVOOA               | Docherty et al. (2011)   |
| A_HR_004           | SVOOA               | Docherty et al. (2011)   |
| A_HR_005           | BBOA                | Aiken et al. (2009)      |
| A_HR_006           | HOA                 | Aiken et al. (2009)      |
| A_HR_007           | LVOOA               | Aiken et al. (2009)      |
| A_HR_008           | SVOOA               | Aiken et al. (2009)      |
| A_HR_013           | BBOA                | Mohr et al. (2012)       |
| A_HR_014           | COA                 | Mohr et al. (2012)       |
| A_HR_015           | HOA                 | Mohr et al. (2012)       |
| A_HR_016           | LVOOA               | Mohr et al. (2012)       |
| A_HR_017           | SVOOA               | Mohr et al. (2012)       |
| A_HR_018           | HOA                 | Setyan et al. (2012)     |
| A_HR_019           | LOOOA               | Setyan et al. (2012)     |
| A_HR_020           | MOOOA               | Setyan et al. (2012)     |
| A_HR_021           | OOAa                | Saarikoski et al. (2012) |
| A_HR_022           | OOAb                | Saarikoski et al. (2012) |
| A_HR_023           | OOAc                | Saarikoski et al. (2012) |
| A_HR_024           | HOA                 | Saarikoski et al. (2012) |
| A_HR_025           | BBOA                | Saarikoski et al. (2012) |
| A_HR_026           | NOA                 | Saarikoski et al. (2012) |
| A_HR_027           | COA                 | Crippa et al. (2013b)    |
| A_HR_028           | SVOOA               | Crippa et al. (2013b)    |
| A_HR_030           | LV-OOA              | Crippa et al. (2013b)    |
| A_HR_031           | HOA                 | Crippa et al. (2013b)    |
| A_HR_032           | BBOA                | Elser et al. (2016)      |
| A_HR_033           | HOA                 | Elser et al. (2016)      |
| A_HR_034           | COA                 | Elser et al. (2016)      |
| A_HR_035           | CCOA                | Elser et al. (2016)      |
| A_HR_036           | OOA                 | Elser et al. (2016)      |

(continued on next page)



**Table S3: List of mass spectra used as reference to calculate average mass spectra for the respective aerosol types (Ulbrich et al., 2022). (continued)**

| <b>Spectrum ID</b> | <b>Aerosol type</b> | <b>Reference</b>          |
|--------------------|---------------------|---------------------------|
| A_HR_037           | BBOA                | Struckmeier et al. (2016) |
| A_HR_038           | COA                 | Struckmeier et al. (2016) |
| A_HR_039           | HOA                 | Struckmeier et al. (2016) |
| A_HR_040           | LVOOA               | Struckmeier et al. (2016) |
| A_HR_041           | SVOOA               | Struckmeier et al. (2016) |
| A_HR_042           | COA                 | Struckmeier et al. (2016) |
| A_HR_043           | HOA                 | Struckmeier et al. (2016) |
| A_HR_044           | LVOOA               | Struckmeier et al. (2016) |
| A_HR_045           | SVOOA               | Struckmeier et al. (2016) |
| A_HR_046           | CSOA                | Struckmeier et al. (2016) |
| A_HR_047           | HOA                 | Hayes et al. (2013)       |
| A_HR_048           | COA                 | Hayes et al. (2013)       |
| A_HR_050           | LVOOA               | Hayes et al. (2013)       |
| A_HR_051           | SVOOA               | Hayes et al. (2013)       |
| A_HR_055           | CCOA                | Hu et al. (2013)          |
| A_HR_056           | HOA                 | Hu et al. (2013)          |
| A_HR_057           | SVOOA               | Hu et al. (2013)          |
| A_HR_058           | LVOOA               | Hu et al. (2013)          |
| A_HR_059           | HOA                 | Hu et al. (2016)          |
| A_HR_060           | COA                 | Hu et al. (2016)          |
| A_HR_061           | LOOOA               | Hu et al. (2016)          |
| A_HR_062           | MOOOA               | Hu et al. (2016)          |
| A_HR_063           | LOOOA               | Hu et al. (2016)          |
| A_HR_064           | MOOOA               | Hu et al. (2016)          |
| A_HR_065           | COA                 | Hu et al. (2016)          |
| A_HR_066           | HOA                 | Hu et al. (2016)          |
| A_HR_067           | BBOA                | Hu et al. (2016)          |
| A_HR_068           | CCOA                | Hu et al. (2016)          |
| A_HR_069           | IEPOX-SOA           | Hu et al. (2015)          |
| A_HR_070           | MOOOA               | Hu et al. (2015)          |

90 (continued on next page)

**Table S3: List of mass spectra used as reference to calculate average mass spectra for the respective aerosol types (Ulbrich et al., 2022). (continued)**

| <b>Spectrum ID</b> | <b>Aerosol type</b> | <b>Reference</b>      |
|--------------------|---------------------|-----------------------|
| A_HR_071           | LOOOAI              | Hu et al. (2015)      |
| A_HR_072           | LOOOAII             | Hu et al. (2015)      |
| A_HR_073           | MOOOA               | Hu et al. (2018)      |
| A_HR_074           | LOOOA               | Hu et al. (2018)      |
| A_HR_075           | HOA                 | Hu et al. (2018)      |
| A_DEC_C_032        | HOA                 | Hersey et al. (2011)  |
| A_DEC_C_033        | LVOOA               | Hersey et al. (2011)  |
| A_DEC_C_034        | SVOOA               | Hersey et al. (2011)  |
| A_DEC_W_035        | BBOA                | Crippa et al. (2013a) |
| A_DEC_W_036        | COA                 | Crippa et al. (2013a) |
| A_DEC_W_037        | HOA                 | Crippa et al. (2013a) |
| A_DEC_W_038        | LVOOA               | Crippa et al. (2013a) |
| A_DEC_C_044        | HOA                 | Craven et al. (2013)  |
| A_DEC_C_045        | SVOOA               | Craven et al. (2013)  |
| A_DEC_C_046        | LVOOA               | Craven et al. (2013)  |

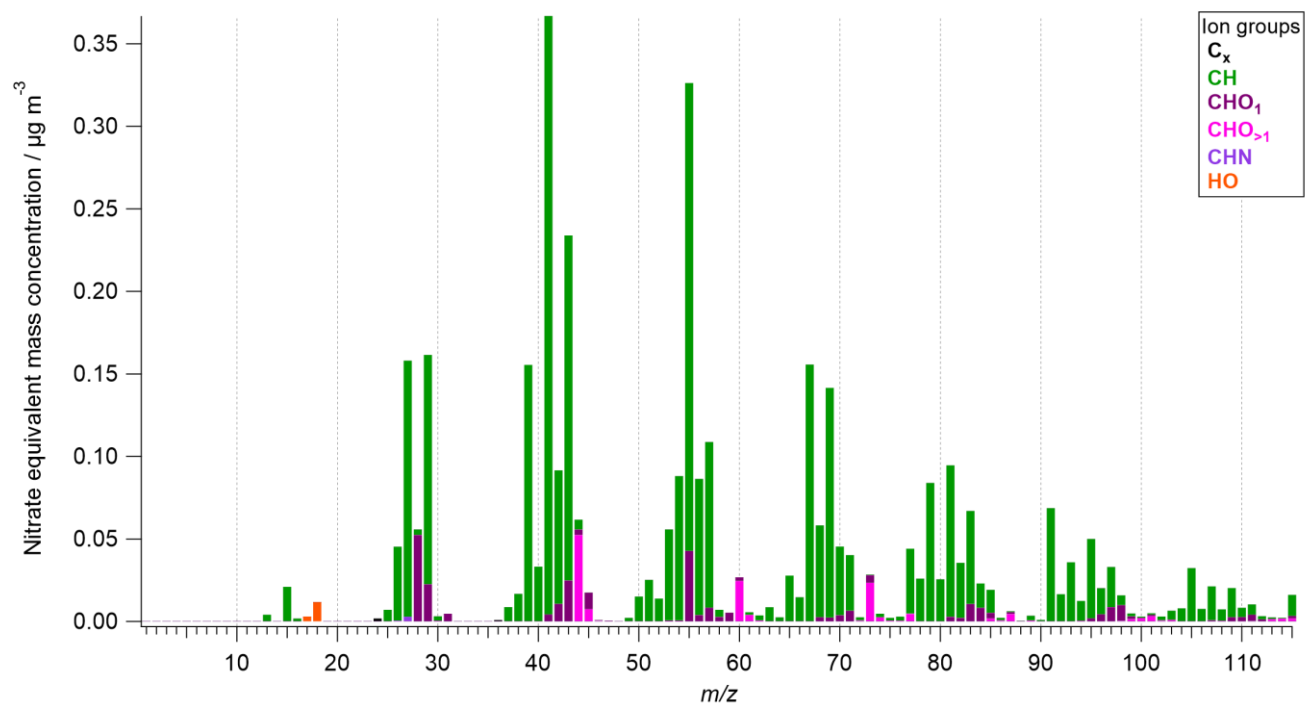

Figure S1: Organic mass spectrum of heated rapeseed oil measured with the HR-ToF-AMS.

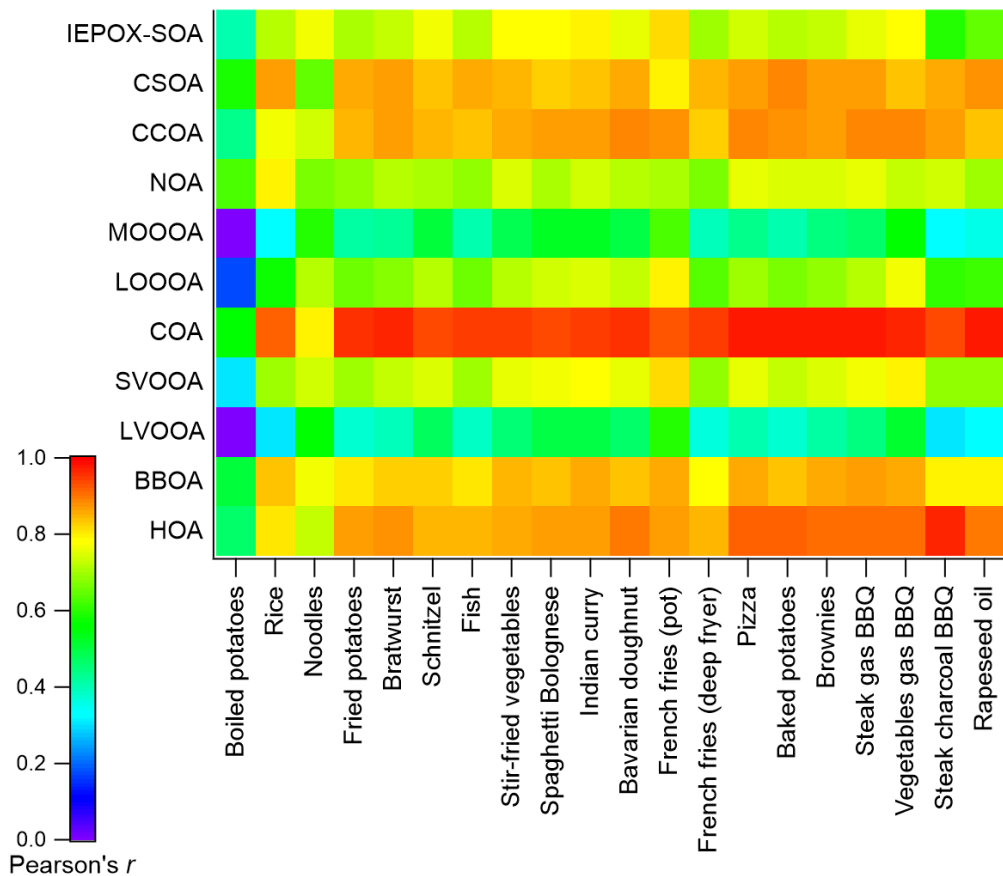

100 **Figure S2: Linear correlation of the averaged organic mass spectra of cooking emissions for all laboratory experiments and pure rapeseed oil with average mass spectra of different aerosol types from the AMS spectra database (Ulbrich et al., 2022), color-coded based on the respective correlation coefficient (Pearson's  $r$ ). The list of the used mass spectra is in Table S3.**

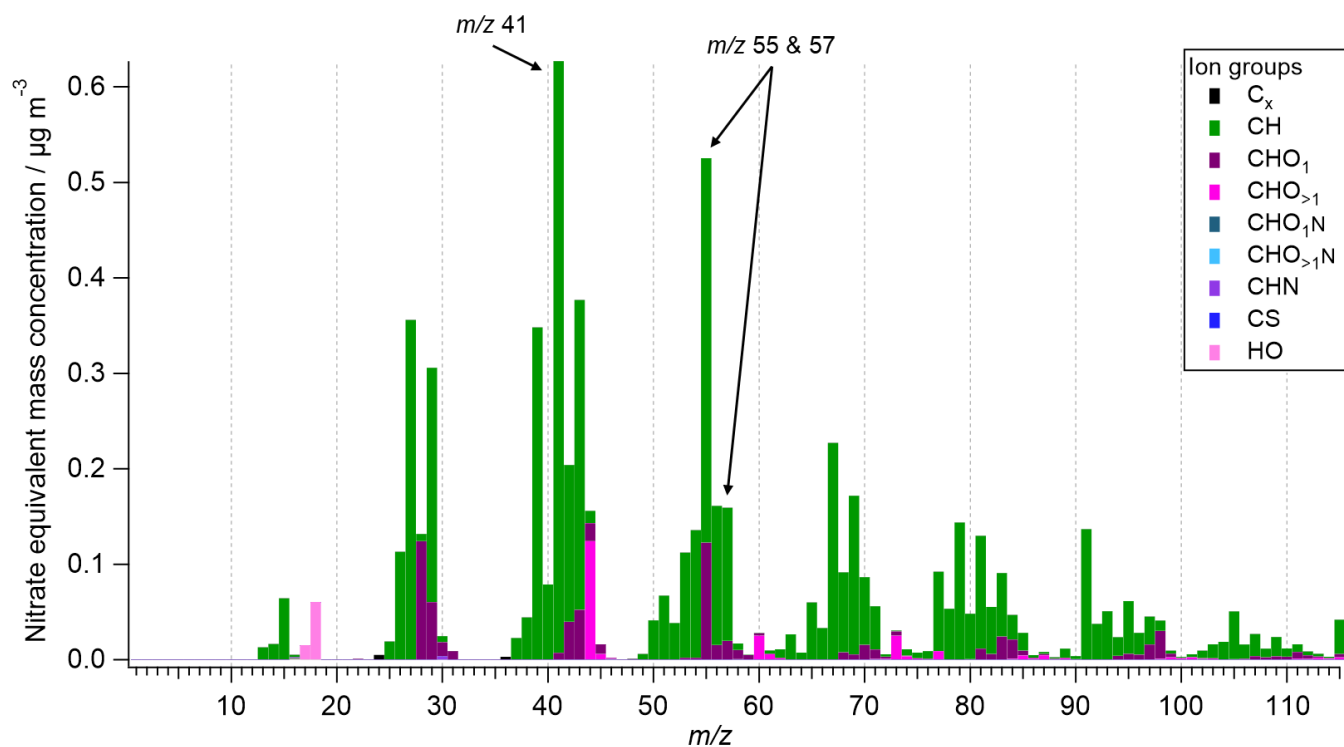

105 Figure S3: Unit-resolution mass spectrum of emitted organic aerosol from frying bratwurst with important  $m/z$  marked.

Table S4: Average ratio of signal intensities at  $m/z$  67 and 69 from mass spectra of different aerosol types. The standard deviation was calculated from the available data using the AMS spectra database (Ulbrich et al., 2022). If no standard deviation is stated, only a single mass spectrum was available for the respective aerosol type.

| Aerosol type | Ratio of signal intensities at $m/z$ 67 and 69 |
|--------------|------------------------------------------------|
| HOA          | $0.63 \pm 0.30$                                |
| BBOA         | $0.63 \pm 0.36$                                |
| LVOOA        | $0.78 \pm 0.43$                                |
| SVOOA        | $0.88 \pm 0.53$                                |
| LOOOA        | $0.87 \pm 0.50$                                |
| MOOOA        | $1.03 \pm 0.80$                                |
| NOA          | 0.55                                           |
| CCOA         | $0.61 \pm 0.15$                                |
| CSOA         | 0.72                                           |
| IEPOX-SOA    | 0.71                                           |

110

**Table S5: RIE<sub>COA</sub> and density values derived from the presented laboratory experiments and other studies.**

| <b>Dishes / measurements</b>                                                   | <b>RIE<sub>COA</sub></b> | <b>Density / g cm<sup>-3</sup></b> |
|--------------------------------------------------------------------------------|--------------------------|------------------------------------|
| <b>Laboratory experiments</b>                                                  |                          |                                    |
| Fried potatoes                                                                 | 2.03                     | 0.96                               |
| Bratwurst                                                                      | 2.17                     | 0.94                               |
| Schnitzel                                                                      | 2.34                     | 0.99                               |
| Fish                                                                           | 2.48                     | 0.96                               |
| Spaghetti Bolognese                                                            | 1.53                     | 1.03                               |
| Indian curry                                                                   | 2.16                     | 1.01                               |
| Stir-fried vegetables                                                          | 1.83                     | 1.01                               |
| Bavarian doughnut                                                              | 1.83                     | 1.03                               |
| French fries (pot)                                                             | 1.58                     | 0.96                               |
| French fries (deep fryer)                                                      | 2.52                     | 0.97                               |
| Steak gas BBQ (grilling)                                                       | 2.11                     | 0.98                               |
| Vegetables gas BBQ (grilling)                                                  | 1.79                     | 0.97                               |
| Steak charcoal BBQ (grilling)                                                  | 2.27                     | 0.91                               |
| Steak gas BBQ (warm up) <sup>a</sup>                                           | 1.53                     | 0.98                               |
| Vegetables gas BBQ (warm up) <sup>a</sup>                                      | 1.79                     | 0.97                               |
| Steak charcoal BBQ (warm up) <sup>a</sup>                                      | 2.51                     | 0.91                               |
| Average ± standard deviation                                                   | 2.05 ± 0.32              | 0.98 ± 0.03                        |
| <b>Reyes-Villegas et al. (2018) – values for diluted emission measurements</b> |                          |                                    |
| Deep fried plus English breakfast                                              | 2.63                     |                                    |
| English breakfast                                                              | 2.35                     |                                    |
| Deep fried                                                                     | 3.06                     |                                    |
| Shallow fried meat (stir fried)                                                | 1.85                     |                                    |
| Shallow fried meat (chops)                                                     | 1.56                     |                                    |
| Average ± standard deviation                                                   | 2.29 ± 0.60              |                                    |

<sup>a</sup>Value not included in average RIE<sub>COA</sub> and density.

(continued on next page)

Table S5: RIECOA and density values derived from the presented laboratory experiments and other studies. (continued)

| Dishes / measurements        | RIE <sub>COA</sub> | Density / g cm <sup>-3</sup> |
|------------------------------|--------------------|------------------------------|
| <b>Katz et al. (2021)</b>    |                    |                              |
| ATHLETIC Nov. 6              | 4.61 ± 1.52        | 0.95                         |
| ATHLETIC Nov. 7              | 4.96 ± 1.64        |                              |
| ATHLETIC Nov. 16             | 4.26 ± 1.41        |                              |
| HOMEChem Thanksgiving        | 5.73 ± 1.89        | 1.0                          |
| HOMEChem Breakfast           | 6.50 ± 2.15        |                              |
| HOMEChem Stir Fry            | 4.70 ± 1.55        |                              |
| HOMEChem Beef Chili          | 5.35 ± 1.77        |                              |
| Average ± standard deviation | 5.16 ± 0.77        |                              |

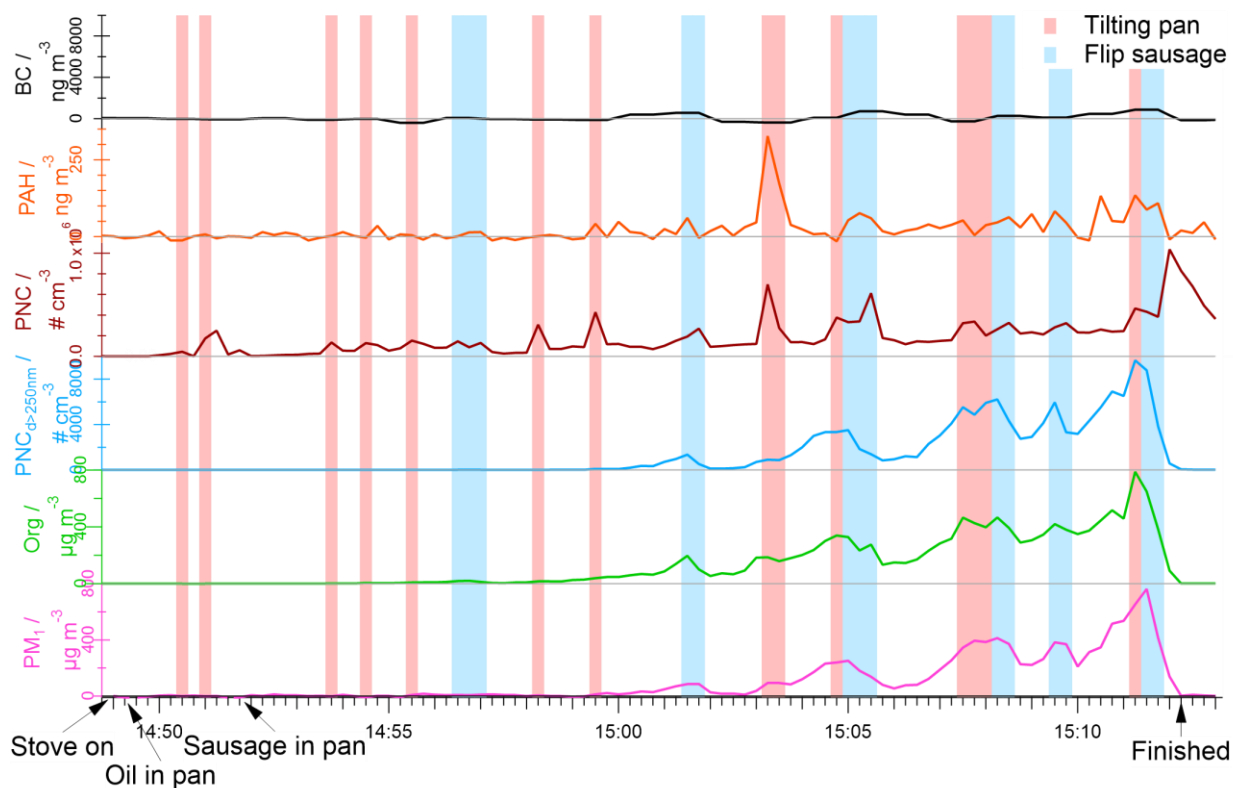

Figure S4: Time series of the six most relevant variables for the experiment “frying bratwurst”. Highlighted in red and blue are the activities “tilting pan” and “flip sausage” during the experiment.

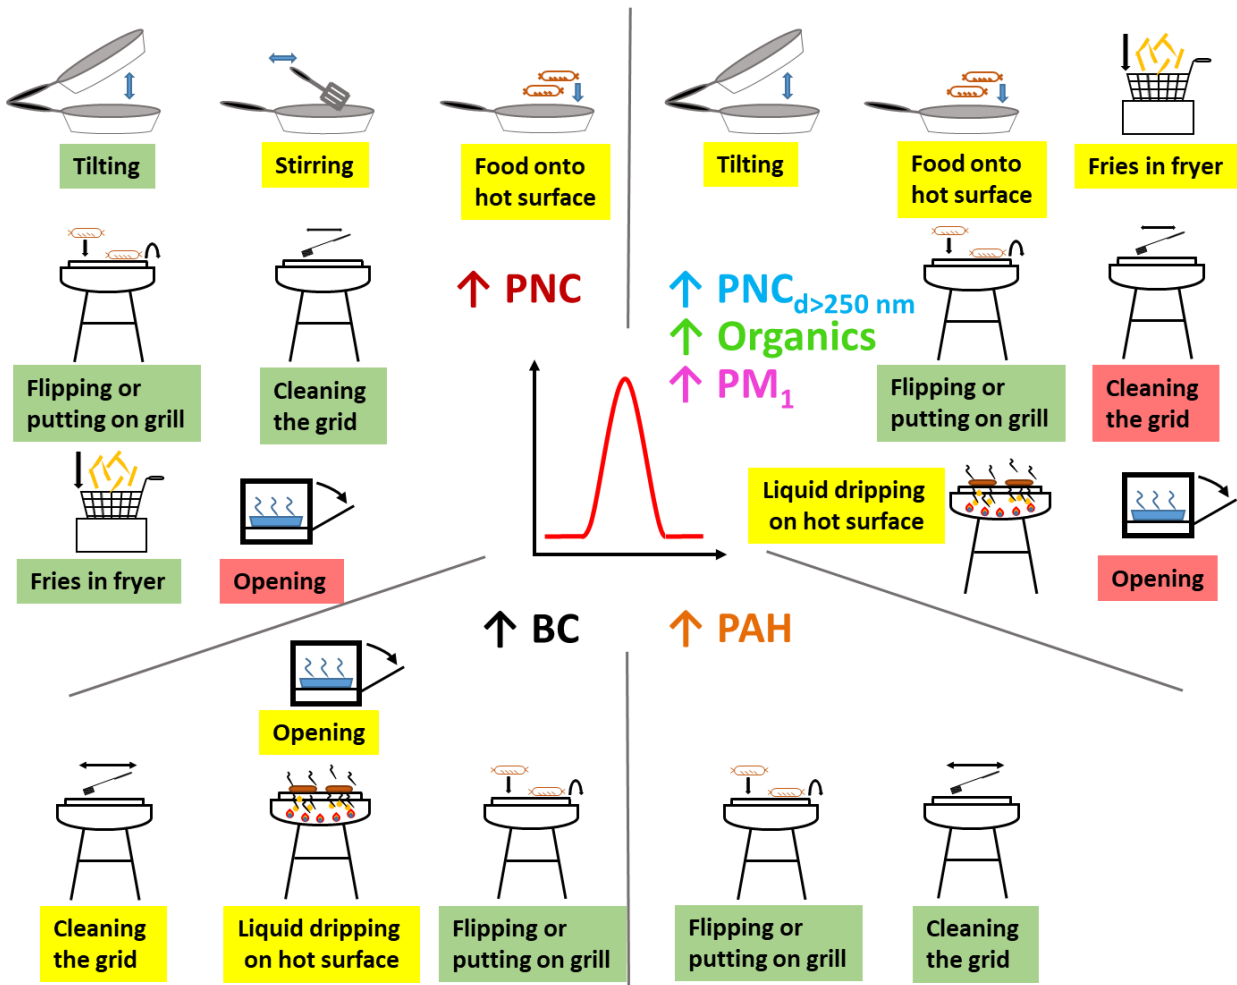

125 Figure S5: Explanation of symbols for different activities that lead to short-time concentration increases as shown in Fig. 7.



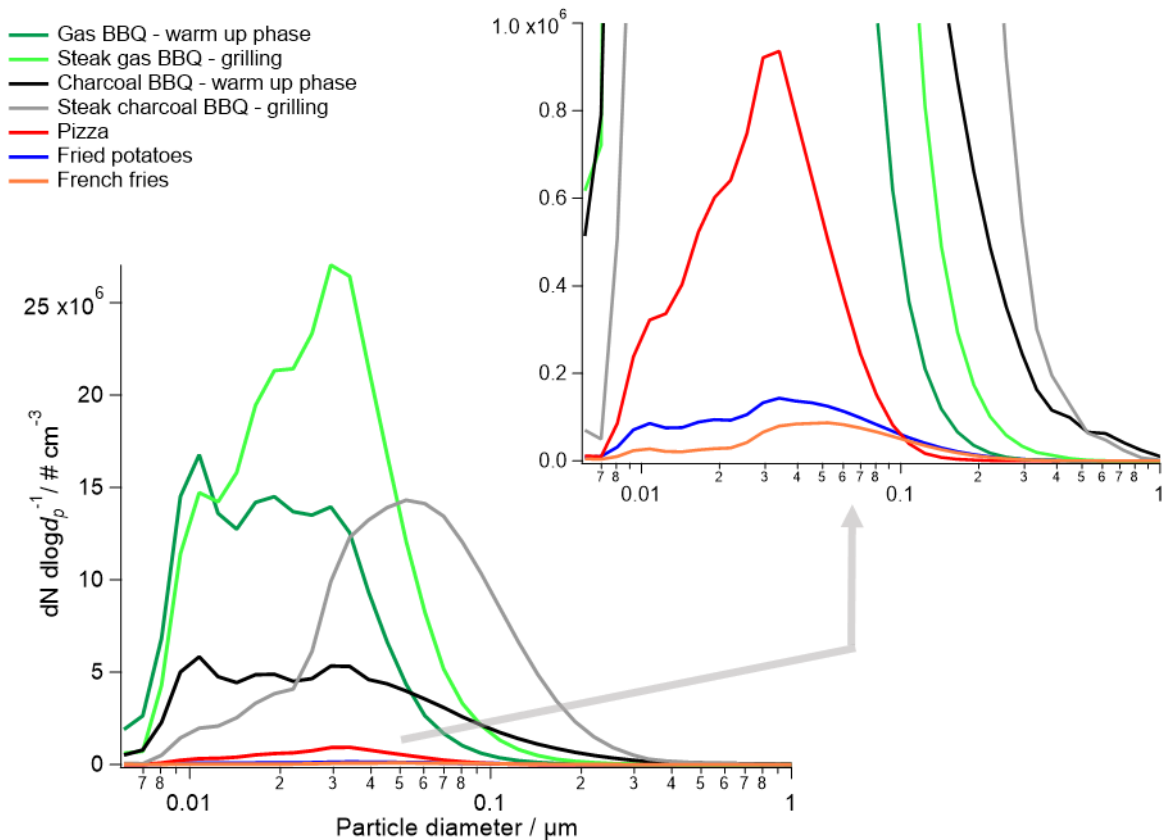

**Figure S6:** Averaged particle number size distribution for five dishes, one exemplary dish for each preparation method (except boiling due to low concentrations). For the grilling experiments, the warm up and grilling period were averaged separately. The upper right insert is a magnified close-up of the size distributions.

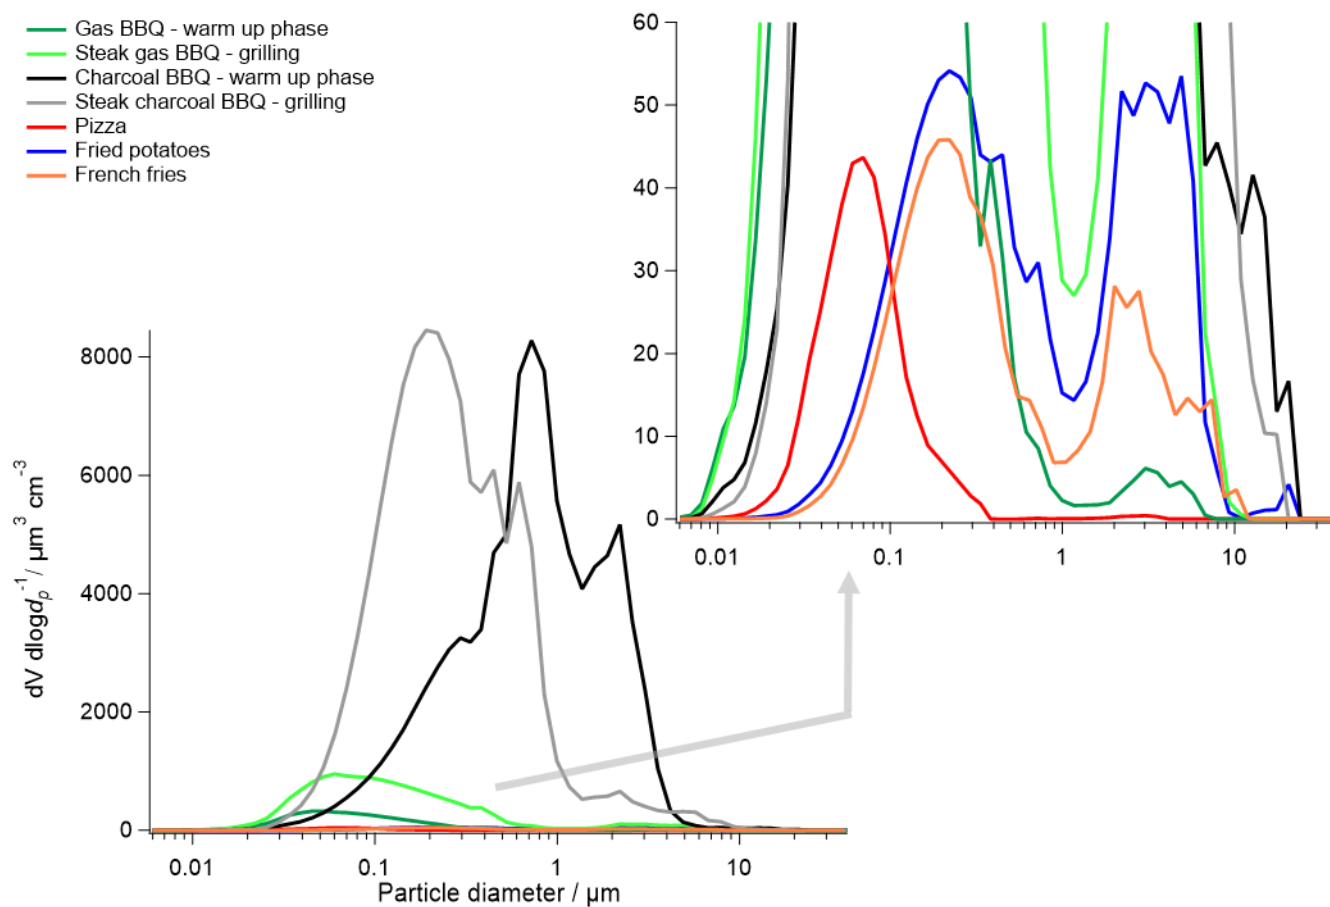

**Figure S7: Averaged particle volume size distribution for five dishes, one exemplary dish for each preparation method (except boiling due to low concentrations). For the grilling experiments, the warm up and grilling period were averaged separately. The upper right insert is a magnified close-up of the size distributions.**

135 **Table S6: Emission factors (average and standard deviation) for the measured variables and all dishes. No values are listed if the calculated values were negative or if there was no increase of the concentration compared to background.**

| Dishes                    | PN / kg <sup>-1</sup> |                      | PM <sub>1</sub> / g kg <sup>-1</sup> |                      | PM <sub>2.5</sub> / g kg <sup>-1</sup> |                      | PM <sub>10</sub> / g kg <sup>-1</sup> |                      | Organics / mg kg <sup>-1</sup> |        | PN <sub>d&gt;250 nm</sub> / kg <sup>-1</sup> |                     |
|---------------------------|-----------------------|----------------------|--------------------------------------|----------------------|----------------------------------------|----------------------|---------------------------------------|----------------------|--------------------------------|--------|----------------------------------------------|---------------------|
|                           | AVG                   | STD                  | AVG                                  | STD                  | AVG                                    | STD                  | AVG                                   | STD                  | AVG                            | STD    | AVG                                          | STD                 |
| Boiled potatoes           | 3·10 <sup>12</sup>    | 4.7·10 <sup>12</sup> | 1.7·10 <sup>-4</sup>                 | 1.4·10 <sup>-4</sup> | 1.9·10 <sup>-4</sup>                   | 1.4·10 <sup>-4</sup> | 2.7·10 <sup>-4</sup>                  | 2.1·10 <sup>-4</sup> | 0.05                           | 0.05   | 5·10 <sup>7</sup>                            | 2·10 <sup>8</sup>   |
| Rice                      | 1.8·10 <sup>12</sup>  | 1.6·10 <sup>12</sup> | 1.0·10 <sup>-3</sup>                 | 5.1·10 <sup>-4</sup> | 1.0·10 <sup>-3</sup>                   | 5.2·10 <sup>-4</sup> | 1.0·10 <sup>-3</sup>                  | 5.2·10 <sup>-4</sup> | 0.34                           | 0.36   | 9.3·10 <sup>9</sup>                          | 5.4·10 <sup>9</sup> |
| Noodles                   | 1.4·10 <sup>12</sup>  | 3.1·10 <sup>11</sup> | 1.3·10 <sup>-3</sup>                 | 1.2·10 <sup>-4</sup> | 1.3·10 <sup>-3</sup>                   | 3.2·10 <sup>-5</sup> | 1.3·10 <sup>-3</sup>                  | 4.9·10 <sup>-5</sup> | 0.19                           | 0.0067 | 9·10 <sup>9</sup>                            | 4·10 <sup>9</sup>   |
| Fried potatoes            | 4·10 <sup>13</sup>    | 9.2·10 <sup>12</sup> | 1.7·10 <sup>-2</sup>                 | 6.3·10 <sup>-3</sup> | 2.0·10 <sup>-2</sup>                   | 6.7·10 <sup>-3</sup> | 2.8·10 <sup>-2</sup>                  | 7.2·10 <sup>-3</sup> | 14                             | 5.8    | 2·10 <sup>11</sup>                           | 5·10 <sup>10</sup>  |
| Bratwurst                 | 4.8·10 <sup>13</sup>  | 1.1·10 <sup>13</sup> | 1.8·10 <sup>-2</sup>                 | 7.4·10 <sup>-3</sup> | 1.8·10 <sup>-2</sup>                   | 1.2·10 <sup>-2</sup> | 1.9·10 <sup>-2</sup>                  | 1.2·10 <sup>-2</sup> | 23                             | 10     | 2·10 <sup>11</sup>                           | 1·10 <sup>11</sup>  |
| Schnitzel                 | 1.9·10 <sup>13</sup>  | 3.3·10 <sup>12</sup> | 3.9·10 <sup>-3</sup>                 | 2.3·10 <sup>-4</sup> | 5.0·10 <sup>-3</sup>                   | 5.9·10 <sup>-4</sup> | 5.7·10 <sup>-3</sup>                  | 7.2·10 <sup>-4</sup> | 3.3                            | 0.087  | 3·10 <sup>10</sup>                           | 3·10 <sup>9</sup>   |
| Fish                      | 4.6·10 <sup>13</sup>  | 7.3·10 <sup>12</sup> | 2.6·10 <sup>-2</sup>                 | 6.5·10 <sup>-3</sup> | 3.0·10 <sup>-2</sup>                   | 9.8·10 <sup>-3</sup> | 3.4·10 <sup>-2</sup>                  | 8.9·10 <sup>-3</sup> | 27                             | 7.9    | 3·10 <sup>11</sup>                           | 1·10 <sup>11</sup>  |
| Spaghetti Bolognese       | 7.6·10 <sup>12</sup>  | 3.1·10 <sup>12</sup> | 2.4·10 <sup>-3</sup>                 | 3.3·10 <sup>-4</sup> | 3.2·10 <sup>-3</sup>                   | 1.7·10 <sup>-4</sup> | 4.0·10 <sup>-3</sup>                  | 1.0·10 <sup>-4</sup> | 1.9                            | 0.24   | 3·10 <sup>10</sup>                           | 2·10 <sup>9</sup>   |
| Indian curry              | 6.2·10 <sup>12</sup>  | 3.6·10 <sup>12</sup> | 1.3·10 <sup>-3</sup>                 | 2.8·10 <sup>-4</sup> | 2.0·10 <sup>-3</sup>                   | 2.4·10 <sup>-4</sup> | 2.5·10 <sup>-3</sup>                  | 3.3·10 <sup>-4</sup> | 1                              | 0.3    | 2·10 <sup>10</sup>                           | 5·10 <sup>9</sup>   |
| Stir-fried vegetables     | 7.8·10 <sup>12</sup>  | 3·10 <sup>12</sup>   | 2.2·10 <sup>-3</sup>                 | 1.1·10 <sup>-3</sup> | 3.1·10 <sup>-3</sup>                   | 6.5·10 <sup>-4</sup> | 3.9·10 <sup>-3</sup>                  | 6.8·10 <sup>-4</sup> | 2.2                            | 0.64   | 2·10 <sup>10</sup>                           | 7·10 <sup>9</sup>   |
| Bavarian doughnut         | 5.5·10 <sup>12</sup>  | 5.8·10 <sup>11</sup> | 5.5·10 <sup>-3</sup>                 | 3.2·10 <sup>-3</sup> | 5.6·10 <sup>-3</sup>                   | 5.3·10 <sup>-3</sup> | 5.7·10 <sup>-3</sup>                  | 5.3·10 <sup>-3</sup> | 4.9                            | 4.3    | 5·10 <sup>10</sup>                           | 5·10 <sup>10</sup>  |
| French fries (pot)        | 1.1·10 <sup>13</sup>  | 6.5·10 <sup>12</sup> | 3.8·10 <sup>-3</sup>                 | 1.9·10 <sup>-3</sup> | 5.0·10 <sup>-3</sup>                   | 2.3·10 <sup>-3</sup> | 5.8·10 <sup>-3</sup>                  | 2.5·10 <sup>-3</sup> | 3.2                            | 2      | 4·10 <sup>10</sup>                           | 3·10 <sup>10</sup>  |
| French fries (deep fryer) | 1.1·10 <sup>13</sup>  | 5.6·10 <sup>12</sup> | 6.3·10 <sup>-3</sup>                 | 8.4·10 <sup>-4</sup> | 7.5·10 <sup>-3</sup>                   | 1.0·10 <sup>-3</sup> | 9.1·10 <sup>-3</sup>                  | 1.2·10 <sup>-3</sup> | 5.6                            | 1.1    | 1·10 <sup>11</sup>                           | 2·10 <sup>10</sup>  |
| Pizza                     | 1.3·10 <sup>14</sup>  | 4.2·10 <sup>13</sup> | 7.0·10 <sup>-3</sup>                 | 2.5·10 <sup>-3</sup> | 7.0·10 <sup>-3</sup>                   | 2.6·10 <sup>-3</sup> | 7.1·10 <sup>-3</sup>                  | 2.6·10 <sup>-3</sup> | 5.5                            | 2      | 8·10 <sup>7</sup>                            | 5·10 <sup>7</sup>   |
| Baked potatoes            | 3.3·10 <sup>13</sup>  | 7.7·10 <sup>12</sup> | 6.9·10 <sup>-4</sup>                 | 1.5·10 <sup>-4</sup> | 7.4·10 <sup>-4</sup>                   | 1.3·10 <sup>-4</sup> | 7.7·10 <sup>-4</sup>                  | 1.5·10 <sup>-4</sup> | 0.53                           | 0.19   |                                              |                     |
| Brownies                  | 2.1·10 <sup>12</sup>  | 1.3·10 <sup>12</sup> | 1.6·10 <sup>-3</sup>                 | 1.0·10 <sup>-4</sup> | 1.6·10 <sup>-3</sup>                   | 3.1·10 <sup>-5</sup> | 1.6·10 <sup>-3</sup>                  | 3.8·10 <sup>-5</sup> | 1.2                            | 0.4    | 2·10 <sup>10</sup>                           | 3·10 <sup>9</sup>   |
| Steak gas BBQ             | 3.9·10 <sup>15</sup>  | 1·10 <sup>15</sup>   | 0.17                                 | 0.049                | 0.17                                   | 0.044                | 0.18                                  | 0.046                | 180                            | 33     | 7·10 <sup>11</sup>                           | 6·10 <sup>10</sup>  |
| Vegetables gas BBQ        | 3·10 <sup>15</sup>    | 1.7·10 <sup>14</sup> | 0.23                                 | 0.11                 | 0.23                                   | 0.077                | 0.24                                  | 0.078                | 260                            | 66     | 9·10 <sup>11</sup>                           | 3·10 <sup>11</sup>  |
| Steak charcoal BBQ        | 2.7·10 <sup>15</sup>  | 2.3·10 <sup>14</sup> | 2.4                                  | 0.32                 | 2.4                                    | 0.48                 | 2.4                                   | 0.49                 | 2100                           | 350    | 2·10 <sup>13</sup>                           | 3·10 <sup>12</sup>  |

(continued on next page)

140 **Table S6: Emission factors (average and standard deviation) for the measured variables and all dishes. No values are listed if the calculated values were negative or if there was no increase of the concentration compared to background. (continued)**

| Dishes                    | BC /<br>µg kg <sup>-1</sup> |       | PAH /<br>µg kg <sup>-1</sup> |     | Sulfate /<br>µg kg <sup>-1</sup> |     | Chloride /<br>µg kg <sup>-1</sup> |     | Ammonium/<br>µg kg <sup>-1</sup> |     | Nitrate /<br>µg kg <sup>-1</sup> |     | NO <sub>x</sub> <sup>a</sup> /<br>mg kg <sup>-1</sup> |     |
|---------------------------|-----------------------------|-------|------------------------------|-----|----------------------------------|-----|-----------------------------------|-----|----------------------------------|-----|----------------------------------|-----|-------------------------------------------------------|-----|
|                           | AVG                         | STD   | AVG                          | STD | AVG                              | STD | AVG                               | STD | AVG                              | STD | AVG                              | STD | AVG                                                   | STD |
| Boiled potatoes           |                             |       |                              |     |                                  |     |                                   |     |                                  |     |                                  |     |                                                       |     |
| Rice                      |                             |       |                              |     |                                  |     |                                   |     |                                  |     |                                  |     |                                                       |     |
| Noodles                   |                             |       |                              |     |                                  |     |                                   |     |                                  |     |                                  |     |                                                       |     |
| Fried potatoes            | 220                         | 83    | 27                           | 7.7 |                                  |     | 13                                | 4   |                                  |     |                                  |     |                                                       |     |
| Bratwurst                 | 18                          | 6     | 4.2                          | 2.1 |                                  |     | 35                                | 14  | 9                                | 2   |                                  |     |                                                       |     |
| Schnitzel                 |                             |       |                              |     |                                  |     | 31                                | 5   | 2                                | 0.4 |                                  |     |                                                       |     |
| Fish                      | 380                         | 100   | 3.4                          | 1.5 |                                  |     | 59                                | 6   | 12                               | 2   | 38                               | 18  |                                                       |     |
| Spaghetti Bolognese       |                             |       |                              |     | 15                               | 16  |                                   |     |                                  |     |                                  |     |                                                       |     |
| Indian curry              |                             |       |                              |     | 6                                | 7   |                                   |     |                                  |     |                                  |     |                                                       |     |
| Stir-fried vegetables     |                             |       |                              |     | 52                               | 23  |                                   |     | 2                                | 2   |                                  |     |                                                       |     |
| Bavarian doughnut         |                             |       |                              |     |                                  |     |                                   |     |                                  |     |                                  |     |                                                       |     |
| French fries (pot)        |                             |       |                              |     |                                  |     |                                   |     | 1                                | 1   |                                  |     |                                                       |     |
| French fries (deep fryer) | 57                          | 16    |                              |     |                                  |     |                                   |     | 3                                | 1   |                                  |     |                                                       |     |
| Pizza                     | 23                          | 9     |                              |     |                                  |     |                                   |     |                                  |     |                                  |     |                                                       |     |
| Baked potatoes            |                             |       |                              |     |                                  |     |                                   |     |                                  |     |                                  |     |                                                       |     |
| Brownies                  |                             |       |                              |     |                                  |     |                                   |     |                                  |     |                                  |     |                                                       |     |
| Steak gas BBQ             | 490                         | 22    | 13                           | 2.5 | 26                               | 14  | 400                               | 116 | 59                               | 16  | 914                              | 262 | 190                                                   | 18  |
| Vegetables gas BBQ        | 490                         | 350   | 16                           | 3.6 | 36                               | 6   | 259                               | 136 | 72                               | 19  | 381                              | 227 | 141                                                   | 12  |
| Steak charcoal BBQ        | 28000                       | 13000 | 208                          | 99  | 354                              | 18  | 1953                              | 528 | 311                              | 56  | 1071                             | 175 | 337                                                   | 50  |

<sup>a</sup>Conversion from volume mixing ratio to mass concentration assuming NO<sub>x</sub> is fully converted to NO<sub>2</sub>.

**Table S7: Criteria to calculate emissions from different emission sources for comparison with cooking emissions and references for the used emissions factors.**

| Source            | Activity                                                                                                    | References of the used emission factors                                                                                                                                                                                |
|-------------------|-------------------------------------------------------------------------------------------------------------|------------------------------------------------------------------------------------------------------------------------------------------------------------------------------------------------------------------------|
| Cooking           | Cooking the dish once                                                                                       | This work                                                                                                                                                                                                              |
| Traffic           | Driving over 100 km                                                                                         | Alves et al., 2015; Conte and Contini, 2019; Ho et al., 2009; Imhof et al., 2005; Imhof et al., 2006; Jones and Harrison, 2006; Kittelson et al., 2004; Kostenidou et al., 2021; Wang et al., 2009; Zheng et al., 2018 |
| Biomass burning   | Heating a room of 50 m <sup>2</sup> for 1 h (calorific requirement 60 kWh m <sup>-2</sup> a <sup>-1</sup> ) | Bäfver et al., 2011; Boman et al., 2011; Fachinger et al., 2017; Johansson et al., 2004; Shen et al., 2012                                                                                                             |
| Candle burning    | Burning candle for 1 h                                                                                      | Andersen et al., 2021; Derudi et al., 2014; Pagels et al., 2009; Stabile et al., 2012; Zai et al., 2006                                                                                                                |
| Cigarette smoking | Smoking 2 cigarettes                                                                                        | Daher et al., 2010; Endo et al., 2000; Hearn et al., 2018; Ruprecht et al., 2017; Savdie et al., 2020; Wallace and Ott, 2011                                                                                           |

145

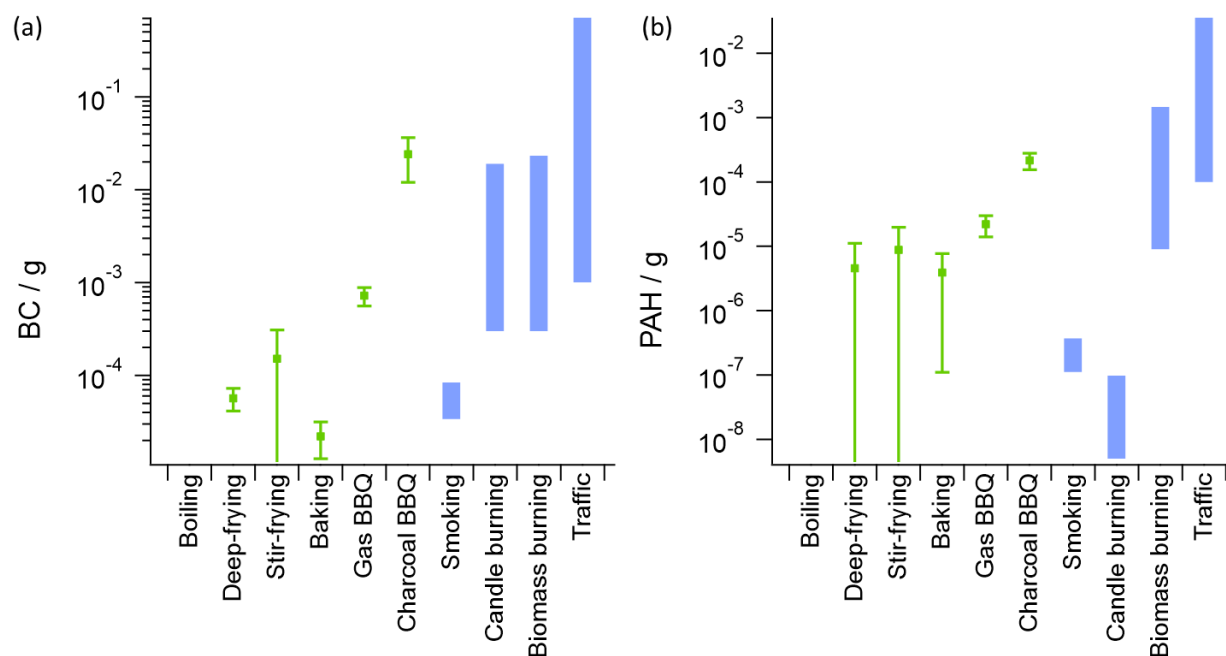

**Figure S8: Total emissions of (a) BC and (b) PAH mass, averaged for the different preparation types with the standard deviation as error bars, and comparison with emissions from other activities, shown as bars indicating the variability found in the literature. No emissions of BC and PAH are observed for boiling.**

150

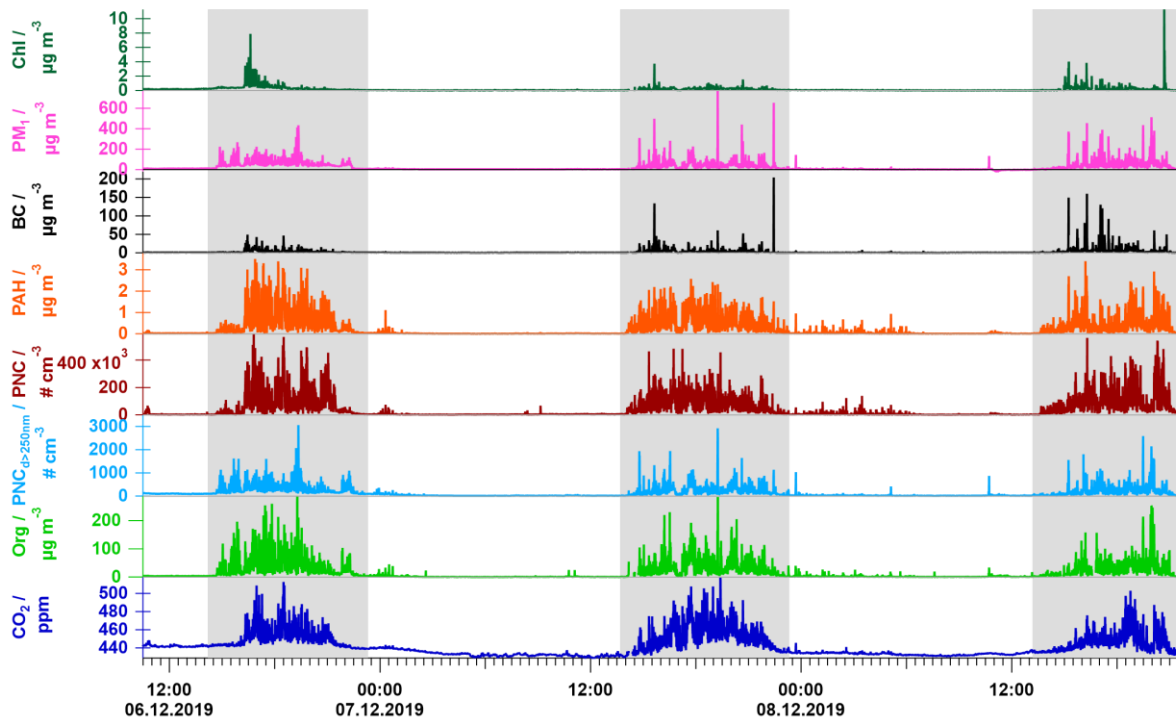

Figure S9: Time series of variables for which the concentrations increased during the Christmas market opening hours (gray shading) in Ingelheim.

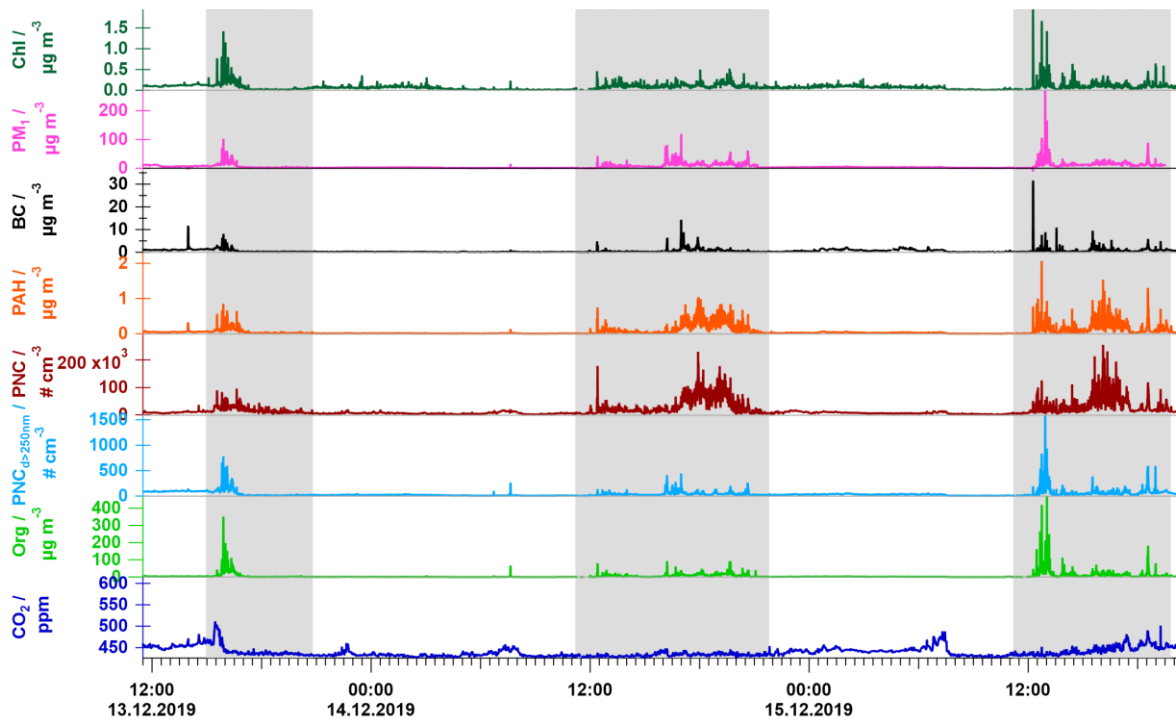

155

Figure S10: Time series of variables for which the concentrations increased during the Christmas market opening hours (gray shading) in Bingen.

160

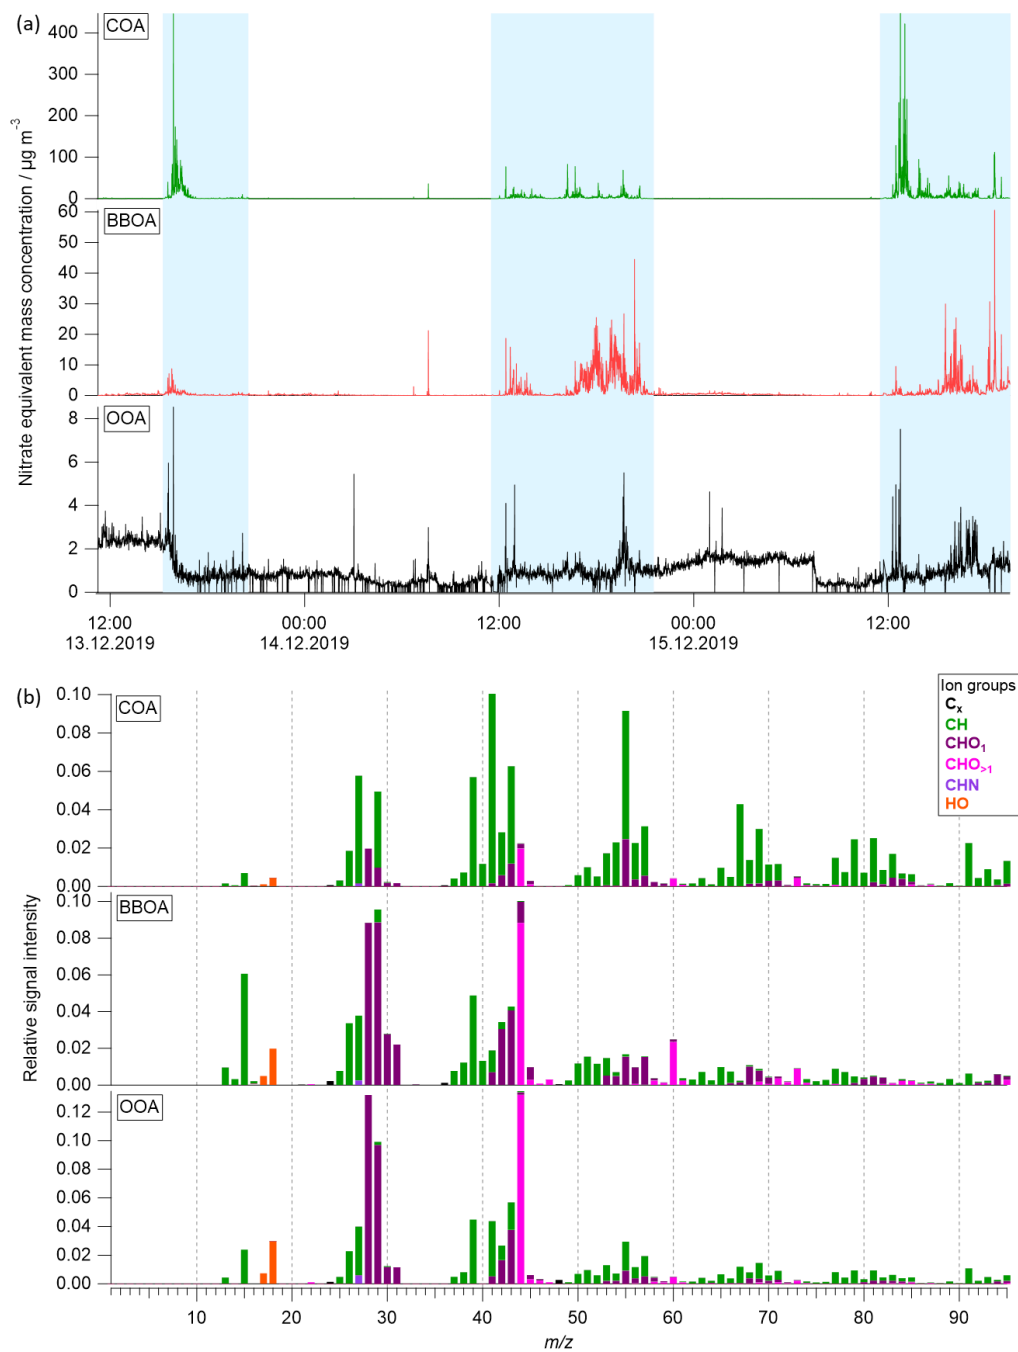

165

**Figure S11: Time series (a) and mass spectra (b) of the chosen PMF-solution representing the aerosol types COA, BBOA, and OOA during the measurements at the Christmas market in Bingen. The opening hours are highlighted in blue.**



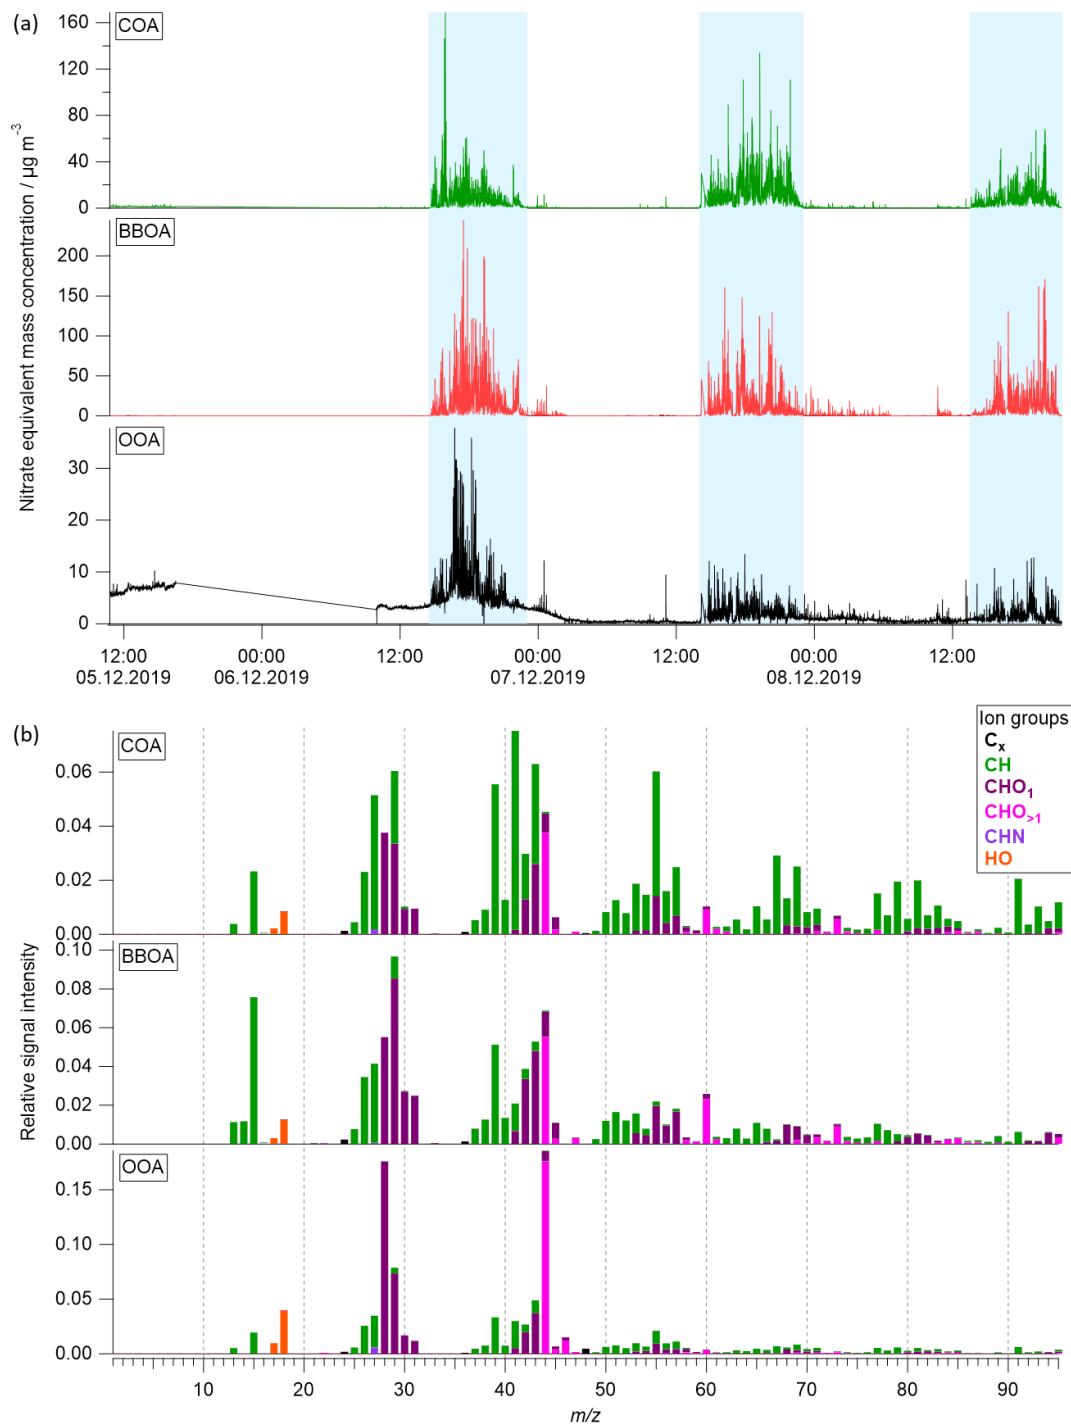

170 **Figure S12: Time series (a) and mass spectra (b) of the chosen PMF-solution representing the aerosol types COA, BBOA, and OOA during the measurements at the Christmas market in Ingelheim. The opening hours are highlighted in blue.**

## References

- Aiken, A. C., Salcedo, D., Cubison, M. J., Huffman, J. A., DeCarlo, P. F., Ulbrich, I. M., Docherty, K. S., Sueper, D., Kimmel, J. R., Worsnop, D. R., Trimborn, A., Northway, M., Stone, E. A., Schauer, J. J., Volkamer, R. M., Fortner, E., Foy, B. de, Wang, J., Laskin, A., Shutthanandan, V., Zheng, J., Zhang, R., Gaffney, J., Marley, N. A., Paredes-Miranda, G., Arnott, W. P., Molina, L. T., Sosa, G., and Jimenez, J. L.: Mexico City aerosol analysis during MILAGRO using high resolution aerosol mass spectrometry at the urban supersite (T0) – Part 1: Fine particle composition and organic source apportionment, *Atmos. Chem. Phys.*, 9, 6633–6653, <https://doi.org/10.5194/acp-9-6633-2009>, 2009.
- Andersen, C., Omelekhina, Y., Rasmussen, B. B., Nygaard Bennekov, M., Skov, S. N., Køcks, M., Wang, K., Strandberg, B., Mattsson, F., Bilde, M., Glasius, M., Pagels, J., and Wierzbicka, A.: Emissions of soot, PAHs, ultrafine particles, NO<sub>x</sub>, and other health relevant compounds from stressed burning of candles in indoor air, *Indoor Air*, 31, 2033–2048, <https://doi.org/10.1111/ina.12909>, 2021.
- Bärfver, L. S., Leckner, B., Tullin, C., and Berntsen, M.: Particle emissions from pellets stoves and modern and old-type wood stoves, *Biomass and Bioenergy*, 35, 3648–3655, <https://doi.org/10.1016/j.biombioe.2011.05.027>, 2011.
- Baron, P. A., Kulkarni, P., and Willeke, K. (Eds.): *Aerosol measurement: Principles, techniques, and applications*, 3rd ed., Engineering professional collection, John Wiley & Sons, Inc., New York, 883 pp., 2011.
- Boman, C., Pettersson, E., Westerholm, R., Boström, D., and Nordin, A.: Stove Performance and Emission Characteristics in Residential Wood Log and Pellet Combustion, Part 1: Pellet Stoves, *Energy Fuels*, 25, 307–314, <https://doi.org/10.1021/ef100774x>, 2011.
- Craven, J. S., Metcalf, A. R., Bahreini, R., Middlebrook, A., Hayes, P. L., Duong, H. T., Sorooshian, A., Jimenez, J. L., Flagan, R. C., and Seinfeld, J. H.: Los Angeles Basin airborne organic aerosol characterization during CalNex, *J. Geophys. Res. Atmos.*, 118, 11,453–11,467, <https://doi.org/10.1002/jgrd.50853>, 2013.
- Crippa, M., DeCarlo, P. F., Slowik, J. G., Mohr, C., Heringa, M. F., Chirico, R., Poulain, L., Freutel, F., Sciare, J., Cozic, J., Di Marco, C. F., Elsasser, M., Nicolas, J. B., Marchand, N., Abidi, E., Wiedensohler, A., Drewnick, F., Schneider, J., Borrmann, S., Nemitz, E., Zimmermann, R., Jaffrezo, J.-L., Prévôt, A. S. H., and Baltensperger, U.: Wintertime aerosol chemical composition and source apportionment of the organic fraction in the metropolitan area of Paris, *Atmos. Chem. Phys.*, 13, 961–981, <https://doi.org/10.5194/acp-13-961-2013>, 2013a.
- Crippa, M., El Haddad, I., Slowik, J. G., DeCarlo, P. F., Mohr, C., Heringa, M. F., Chirico, R., Marchand, N., Sciare, J., Baltensperger, U., and Prévôt, A. S. H.: Identification of marine and continental aerosol sources in Paris using high resolution aerosol mass spectrometry, *J. Geophys. Res.*, 118, 1950–1963, <https://doi.org/10.1002/jgrd.50151>, 2013b.
- Daher, N., Saleh, R., Jaroudi, E., Sheheitli, H., Badr, T., Sepetdjian, E., Al Rashidi, M., Saliba, N., and Shihadeh, A.: Comparison of carcinogen, carbon monoxide, and ultrafine particle emissions from narghile waterpipe and cigarette smoking: Sidestream smoke measurements and assessment of second-hand smoke emission factors, *Atmospheric Environment*, 44, 8–14, <https://doi.org/10.1016/j.atmosenv.2009.10.004>, 2010.

- Derudi, M., Gelosa, S., Sliepcevich, A., Cattaneo, A., Cavallo, D., Rota, R., and Nano, G.: Emission of air pollutants from  
205 burning candles with different composition in indoor environments, *Environmental Science and Pollution Research*, 21,  
4320–4330, <https://doi.org/10.1007/s11356-013-2394-2>, 2014.
- Docherty, K. S., Aiken, A. C., Huffman, J. A., Ulbrich, I. M., DeCarlo, P. F., Sueper, D., Worsnop, D. R., Snyder, D. C.,  
Peltier, R. E., Weber, R. J., Grover, B. D., Eatough, D. J., Williams, B. J., Goldstein, A. H., Ziemann, P. J., and Jimenez,  
210 J. L.: The 2005 Study of Organic Aerosols at Riverside (SOAR-1): instrumental intercomparisons and fine particle  
composition, *Atmos. Chem. Phys.*, 11, 12387–12420, <https://doi.org/10.5194/acp-11-12387-2011>, 2011.
- Drewnick, F., Böttger, T., Weiden-Reinmüller, S.-L. v. d., Zorn, S. R., Klimach, T., Schneider, J., and Borrmann, S.: Design  
of a mobile aerosol research laboratory and data processing tools for effective stationary and mobile field measurements,  
*Atmos. Meas. Tech.*, 5, 1443–1457, <https://doi.org/10.5194/amt-5-1443-2012>, 2012.
- Elser, M., Huang, R.-J., Wolf, R., Slowik, J. G., Wang, Q., Canonaco, F., Li, G., Bozzetti, C., Daellenbach, K. R., Huang,  
215 Y., Zhang, R., Li, Z., Cao, J., Baltensperger, U., El-Haddad, I., and Prévôt, A. S. H.: New insights into PM<sub>2.5</sub> chemical  
composition and sources in two major cities in China during extreme haze events using aerosol mass spectrometry,  
*Atmos. Chem. Phys.*, 16, 3207–3225, <https://doi.org/10.5194/acp-16-3207-2016>, 2016.
- Endo, O., Koyano, M., Mineki, S., Goto, S., Tanabe, K., Yajima, H., Ishii, T., and Matsushita, H.: Estimation of Indoor Air  
PAH Concentration Increases by Cigarette, Incense-Stick, and Mosquito-Repellent-Incense Smoke, *Polycyclic Aromatic*  
220 *Compounds*, 21, 261–272, <https://doi.org/10.1080/10406630008028538>, 2000.
- Fachinger, F., Drewnick, F., Gieré, R., and Borrmann, S.: How the user can influence particulate emissions from residential  
wood and pellet stoves: Emission factors for different fuels and burning conditions, *Atmospheric Environment*, 158,  
216–226, <https://doi.org/10.1016/j.atmosenv.2017.03.027>, 2017.
- Freutel, F., Schneider, J., Drewnick, F., Weiden-Reinmüller, S.-L. v. d., Crippa, M., Prévôt, A. S. H., Baltensperger, U.,  
225 Poulain, L., Wiedensohler, A., Sciare, J., Sarda-Estève, R., Burkhardt, J. F., Eckhardt, S., Stohl, A., Gros, V., Colomb, A.,  
Michoud, V., Doussin, J. F., Borbon, A., Haeffelin, M., Morille, Y., Beekmann, M., and Borrmann, S.: Aerosol particle  
measurements at three stationary sites in the megacity of Paris during summer 2009: meteorology and air mass origin  
dominate aerosol particle composition and size distribution, *Atmos. Chem. Phys.*, 13, 933–959,  
<https://doi.org/10.5194/acp-13-933-2013>, 2013.
- 230 Hayes, P. L., Ortega, A. M., Cubison, M. J., Froyd, K. D., Zhao, Y., Cliff, S. S., Hu, W. W., Toohey, D. W., Flynn, J. H.,  
Lefer, B. L., Grossberg, N., Alvarez, S., Rappenglück, B., Taylor, J. W., Allan, J. D., Holloway, J. S., Gilman, J. B.,  
Kuster, W. C., Gouw, J. A. de, Massoli, P., Zhang, X., Liu, J., Weber, R. J., Corrigan, A. L., Russell, L. M., Isaacman,  
G., Worton, D. R., Kreisberg, N. M., Goldstein, A. H., Thalman, R., Waxman, E. M., Volkamer, R., Lin, Y. H., Surratt,  
J. D., Kleindienst, T. E., Offenberg, J. H., Dusanter, S., Griffith, S., Stevens, P. S., Brioude, J., Angevine, W. M., and  
235 Jimenez, J. L.: Organic aerosol composition and sources in Pasadena, California, during the 2010 CalNex campaign, *J.*  
*Geophys. Res. Atmos.*, 118, 9233–9257, <https://doi.org/10.1002/jgrd.50530>, 2013.

- Hearn, B. A., Ding, Y. S., Watson, C. H., Johnson, T. L., Zewdie, G., Jeong-Im, J. H., Walters, M. J., Holman, M. R., and Rochester, C. G.: Multi-year Study of PAHs in Mainstream Cigarette Smoke, *Tobacco Regulatory Science*, 4, 96–106, <https://doi.org/10.18001/trs.4.3.9>, 2018.
- 240 Hersey, S. P., Craven, J. S., Schilling, K. A., Metcalf, A. R., Sorooshian, A., Chan, M. N., Flagan, R. C., and Seinfeld, J. H.: The Pasadena Aerosol Characterization Observatory (PACO): chemical and physical analysis of the Western Los Angeles basin aerosol, *Atmos. Chem. Phys.*, 11, 7417–7443, <https://doi.org/10.5194/acp-11-7417-2011>, 2011.
- Hinds, W. C.: *Aerosol Technology: Properties, Behavior, and Measurement of Airborne Particles*, 2nd ed., John Wiley & Sons, Inc., Hoboken, 464 pp., 1999.
- 245 Hu, W. W., Campuzano-Jost, P., Palm, B. B., Day, D. A., Ortega, A. M., Hayes, P. L., Krechmer, J. E., Chen, Q., Kuwata, M., Liu, Y. J., Sá, S. S. de, McKinney, K., Martin, S. T., Hu, M., Budisulistiorini, S. H., Riva, M., Surratt, J. D., St. Clair, J. M., Isaacman-Van Wertz, G., Yee, L. D., Goldstein, A. H., Carbone, S., Brito, J., Artaxo, P., Gouw, J. A. de, Koss, A., Wisthaler, A., Mikoviny, T., Karl, T., Kaser, L., Jud, W., Hansel, A., Docherty, K. S., Alexander, M. L., Robinson, N. H., Coe, H., Allan, J. D., Canagaratna, M. R., Paulot, F., and Jimenez, J. L.: Characterization of a real-time  
250 tracer for isoprene epoxydiols-derived secondary organic aerosol (IEPOX-SOA) from aerosol mass spectrometer measurements, *Atmos. Chem. Phys.*, 15, 11807–11833, <https://doi.org/10.5194/acp-15-11807-2015>, 2015.
- Hu, W. W., Hu, M., Yuan, B., Jimenez, J. L., Tang, Q., Peng, J. F., Hu, W., Shao, M., Wang, M., Zeng, L. M., Wu, Y. S., Gong, Z. H., Huang, X. F., and He, L. Y.: Insights on organic aerosol aging and the influence of coal combustion at a regional receptor site of central eastern China, *Atmos. Chem. Phys.*, 13, 10095–10112, <https://doi.org/10.5194/acp-13-10095-2013>, 2013.  
255
- Hu, W., Day, D. A., Campuzano-Jost, P., Nault, B. A., Park, T., Lee, T., Croteau, P., Canagaratna, M. R., Jayne, J. T., Worsnop, D. R., and Jimenez, J. L.: Evaluation of the New Capture Vaporizer for Aerosol Mass Spectrometers (AMS): Elemental Composition and Source Apportionment of Organic Aerosols (OA), *ACS Earth Space Chem.*, 2, 410–421, <https://doi.org/10.1021/acsearthspacechem.8b00002>, 2018.
- 260 Hu, W., Hu, M., Hu, W., Jimenez, J. L., Yuan, B., Chen, W., Wang, M., Wu, Y., Chen, C., Wang, Z., Peng, J., Zeng, L., and Shao, M.: Chemical composition, sources, and aging process of submicron aerosols in Beijing: Contrast between summer and winter, *J. Geophys. Res. Atmos.*, 121, 1955–1977, <https://doi.org/10.1002/2015JD024020>, 2016.
- Johansson, L. S., Leckner, B., Gustavsson, L., Cooper, D., Tullin, C., and Potter, A.: Emission characteristics of modern and old-type residential boilers fired with wood logs and wood pellets, *Atmospheric Environment*, 38, 4183–4195,  
265 <https://doi.org/10.1016/j.atmosenv.2004.04.020>, 2004.
- Katz, E. F., Guo, H., Campuzano-Jost, P., Day, D. A., Brown, W. L., Boedicker, E., Pothier, M., Lunderberg, D. M., Patel, S., Patel, K., Hayes, P. L., Avery, A., Hildebrandt Ruiz, L., Goldstein, A. H., Vance, M. E., Farmer, D. K., Jimenez, J. L., and DeCarlo, P. F.: Quantification of cooking organic aerosol in the indoor environment using aerodyne aerosol mass spectrometers, *Aerosol Science and Technology*, 55, 1099–1114, <https://doi.org/10.1080/02786826.2021.1931013>,  
270 2021.

- Kuwata, M., Zorn, S. R., and Martin, S. T.: Using elemental ratios to predict the density of organic material composed of carbon, hydrogen, and oxygen, *Environmental Science & Technology*, 46, 787–794, <https://doi.org/10.1021/es202525q>, 2012.
- 275 Levin, E. J. T., McMeeking, G. R., Carrico, C. M., Mack, L. E., Kreidenweis, S. M., Wold, C. E., Moosmüller, H., Arnott, W. P., Hao, W. M., Collett, J. L., and Malm, W. C.: Biomass burning smoke aerosol properties measured during Fire Laboratory at Missoula Experiments (FLAME), *J. Geophys. Res.*, 115, 1783, <https://doi.org/10.1029/2009jd013601>, 2010.
- Mohr, C., DeCarlo, P. F., Heringa, M. F., Chirico, R., Slowik, J. G., Richter, R., Reche, C., Alastuey, A., Querol, X., Seco, R., Peñuelas, J., Jiménez, J. L., Crippa, M., Zimmermann, R., Baltensperger, U., and Prévôt, A. S. H.: Identification and 280 quantification of organic aerosol from cooking and other sources in Barcelona using aerosol mass spectrometer data, *Atmos. Chem. Phys.*, 12, 1649–1665, <https://doi.org/10.5194/acp-12-1649-2012>, 2012.
- Pagels, J., Wierzbicka, A., Nilsson, E., Isaxon, C., Dahl, A., Gudmundsson, A., Swietlicki, E., and Bohgard, M.: Chemical composition and mass emission factors of candle smoke particles, *Journal of Aerosol Science*, 40, 193–208, <https://doi.org/10.1016/j.jaerosci.2008.10.005>, 2009.
- 285 Pikkmann, J., Moormann, L., Drewnick, F., and Borrmann, S.: The AERosol and TRACe gas Collector (AERTRACC): an online measurement controlled sampler for source-resolved emission analysis, *Atmos. Meas. Tech.*, <https://doi.org/10.5194/amt-2022-206>, 2022.
- Reitz, P.: Chemical Composition Measurements of Cloud Condensation Nuclei and Ice Nuclei by Aerosol Mass Spectrometry, Dissertation, Johannes Gutenberg-Universität Mainz, Mainz, 2011.
- 290 Reyes-Villegas, E., Bannan, T., Le Breton, M., Mehra, A., Priestley, M., Percival, C., Coe, H., and Allan, J. D.: Online Chemical Characterization of Food-Cooking Organic Aerosols: Implications for Source Apportionment, *Environmental Science & Technology*, 52, 5308–5318, <https://doi.org/10.1021/acs.est.7b06278>, 2018.
- Rumble, J. R.: CRC Handbook of Chemistry and Physics, (Internet Version 2022), 103rd ed., CRC Press/Taylor & Francis, Boca Raton, Florida, 2022.
- 295 Ruprecht, A. A., Marco, C. de, Saffari, A., Pozzi, P., Mazza, R., Veronese, C., Angellotti, G., Munarini, E., Ogliari, A. C., Westerdahl, D., Hasheminassab, S., Shafer, M. M., Schauer, J. J., Repace, J., Sioutas, C., and Boffi, R.: Environmental pollution and emission factors of electronic cigarettes, heat-not-burn tobacco products, and conventional cigarettes, *Aerosol Science and Technology*, 51, 674–684, <https://doi.org/10.1080/02786826.2017.1300231>, 2017.
- Saarikoski, S., Carbone, S., Decesari, S., Giulianelli, L., Angelini, F., Canagaratna, M., Ng, N. L., Trimborn, A., Facchini, 300 M. C., Fuzzi, S., Hillamo, R., and Worsnop, D.: Chemical characterization of springtime submicrometer aerosol in Po Valley, Italy, *Atmos. Chem. Phys.*, 12, 8401–8421, <https://doi.org/10.5194/acp-12-8401-2012>, 2012.
- Salcedo, D., Onasch, T. B., Dzepina, K., Canagaratna, M. R., Zhang, Q., Huffman, J. A., DeCarlo, P. F., Jayne, J. T., Mortimer, P., Worsnop, D. R., Kolb, C. E., Johnson, K. S., Zuberi, B., Marr, L. C., Volkamer, R., Molina, L. T., Molina, M. J., Cardenas, B., Bernabé, R. M., Márquez, C., Gaffney, J. S., Marley, N. A., Laskin, A., Shutthanandan, V., Xie, Y.,

- 305 Brune, W., Leshner, R., Shirley, T., and Jimenez, J. L.: Characterization of ambient aerosols in Mexico City during the MCMA-2003 campaign with Aerosol Mass Spectrometry: results from the CENICA Supersite, *Atmos. Chem. Phys.*, 6, 925–946, <https://doi.org/10.5194/acp-6-925-2006>, 2006.
- Savdie, J., Canha, N., Buitrago, N., and Almeida, S. M.: Passive Exposure to Pollutants from a New Generation of Cigarettes in Real Life Scenarios, *International Journal of Environmental Research and Public Health*, 17, <https://doi.org/10.3390/ijerph17103455>, 2020.
- 310 Seinfeld, J. H. and Pandis, S. N.: *Atmospheric Chemistry and Physics: From Air Pollution to Climate Change*, 2nd ed., Wiley-Interscience, New York, 464 pp., 2006.
- Setyan, A., Zhang, Q., Merkel, M., Knighton, W. B., Sun, Y., Song, C., Shilling, J. E., Onasch, T. B., Herndon, S. C., Worsnop, D. R., Fast, J. D., Zaveri, R. A., Berg, L. K., Wiedensohler, A., Flowers, B. A., Dubey, M. K., and Subramanian, R.: Characterization of submicron particles influenced by mixed biogenic and anthropogenic emissions using high-resolution aerosol mass spectrometry: results from CARES, *Atmos. Chem. Phys.*, 12, 8131–8156, <https://doi.org/10.5194/acp-12-8131-2012>, 2012.
- 315 Shen, G., Tao, S., Wei, S., Zhang, Y., Wang, R., Wang, B., Li, W., Shen, H., Huang, Y., Chen, Y., Chen, H., Yang, Y., Wang, W., Wei, W., Wang, X., Liu, W., Wang, X., and Masse Simonich, S. L.: Reductions in emissions of carbonaceous particulate matter and polycyclic aromatic hydrocarbons from combustion of biomass pellets in comparison with raw fuel burning, *Environmental Science & Technology*, 46, 6409–6416, <https://doi.org/10.1021/es300369d>, 2012.
- 320 Stabile, L., Fuoco, F. C., and Buonanno, G.: Characteristics of particles and black carbon emitted by combustion of incenses, candles and anti-mosquito products, *Building and Environment*, 56, 184–191, <https://doi.org/10.1016/j.buildenv.2012.03.005>, 2012.
- 325 Struckmeier, C., Drewnick, F., Fachinger, F., Gobbi, G. P., and Borrmann, S.: Atmospheric aerosols in Rome, Italy: sources, dynamics and spatial variations during two seasons, *Atmos. Chem. Phys.*, 16, 15277–15299, <https://doi.org/10.5194/acp-16-15277-2016>, 2016.
- Tang, I. N.: Chemical and size effects of hygroscopic aerosols on light scattering coefficients, *J. Geophys. Res.*, 101, 19245–19250, <https://doi.org/10.1029/96JD03003>, 1996.
- 330 Ulbrich, I. M., Handschy, A., Lechner, M., and Jimenez, J.L.: High-Resolution AMS Spectral Database, <http://cires.colorado.edu/jimenez-group/HRAMSsd/>, last access: 21 April 2022, 2022.
- Ulbrich, I. M., Canagaratna, M. R., Zhang, Q., Worsnop, D. R., and Jimenez, J. L.: Interpretation of organic components from Positive Matrix Factorization of aerosol mass spectrometric data, *Atmos. Chem. Phys.*, 9, 2891–2918, <https://doi.org/10.5194/acp-9-2891-2009>, 2009.
- 335 Vetter, T.: Berechnung der Mie-Streufunktionen zur Kalibrierung optischer Partikelzähler, Diploma thesis, Institut für Physik der Atmosphäre, Johannes Gutenberg-Universität Mainz und Abteilung Wolkenphysik und -chemie, Johannes Gutenberg-Universität Mainz, Mainz, 2004.

Wallace, L. and Ott, W.: Personal exposure to ultrafine particles, *Journal of Exposure Science and Environmental Epidemiology*, 21, 20–30, <https://doi.org/10.1038/jes.2009.59>, 2011.

340

Zai, S., Zhen, H., and Jia-song, W.: Studies on the size distribution, number and mass emission factors of candle particles characterized by modes of burning, *Journal of Aerosol Science*, 37, 1484–1496, <https://doi.org/10.1016/j.jaerosci.2006.05.001>, 2006.
